# Supplementary material for: Persistent coding of outcome-predictive cue features in the rat nucleus accumbens
Source: eLife journal article supplement (doi:10.7554/elife.37275), 2018-09-20
Supplement: supp [file elife_poa_e37275_Figure_5_figure_supplement_1.pdf › elife_poa_e37275_Figure_5_figure_supplement_1.pdf]

**A** n = 443

Light block

Unit number

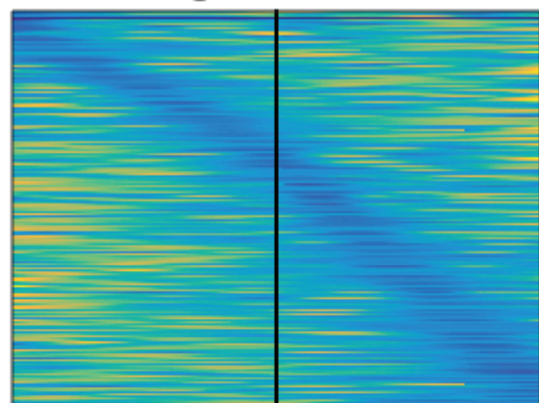

Sound block

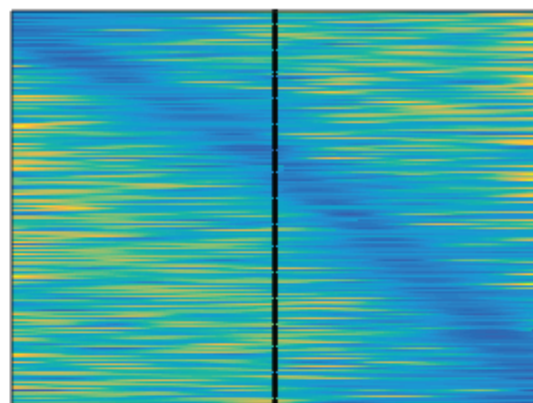

Sound vs. Light block

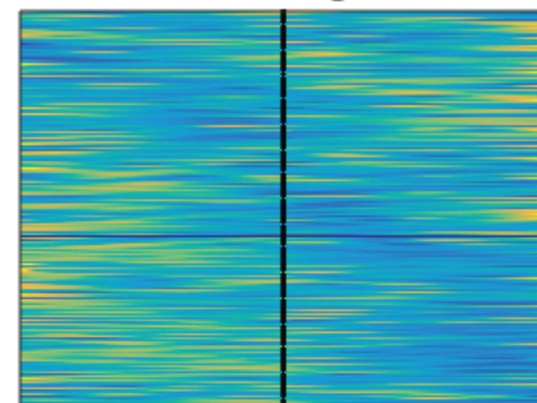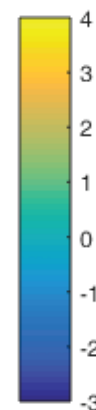

**B**

Arm 1

Unit number

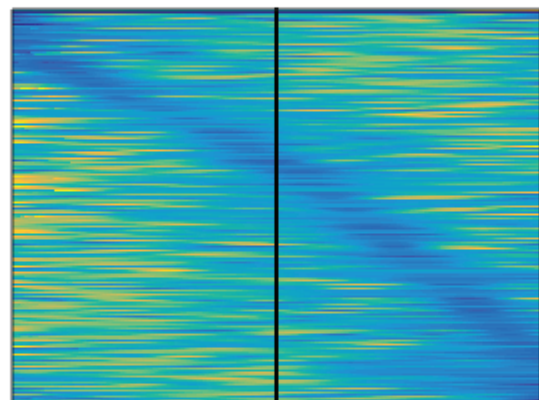

Arm 2

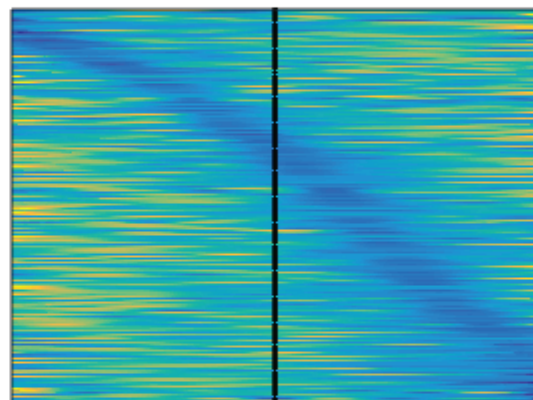

Arm 2 vs. Arm 1

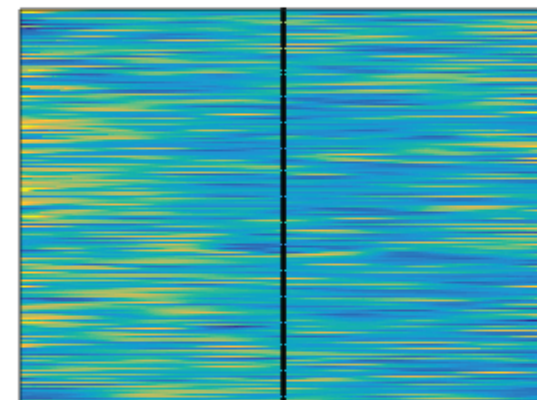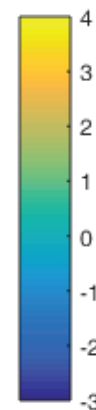

**C**

Reward-available

Unit number

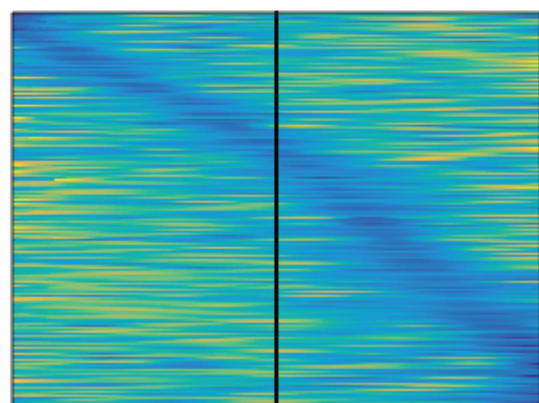

Reward-unavailable

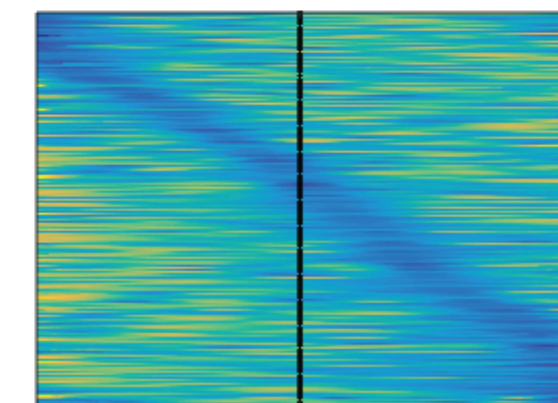

Reward-unavailable vs. -available

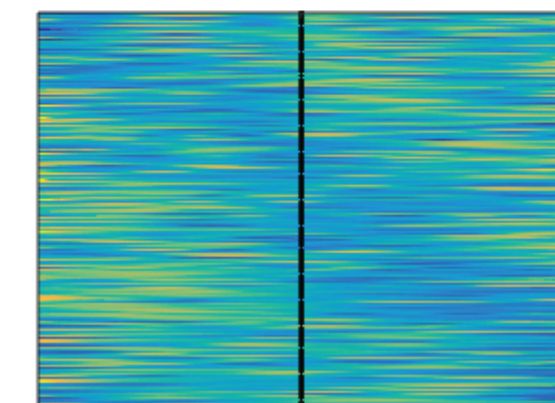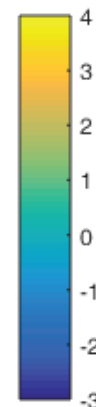

-1 0 1  
Time from cue onset (s)

-1 0 1  
Time from cue onset (s)

-1 0 1  
Time from cue onset (s)
