# Supplementary figures and images for: Persistent coding of outcome-predictive cue features in the rat nucleus accumbens
Source: eLife journal article supplement (doi:10.7554/elife.37275), 2018-09-20

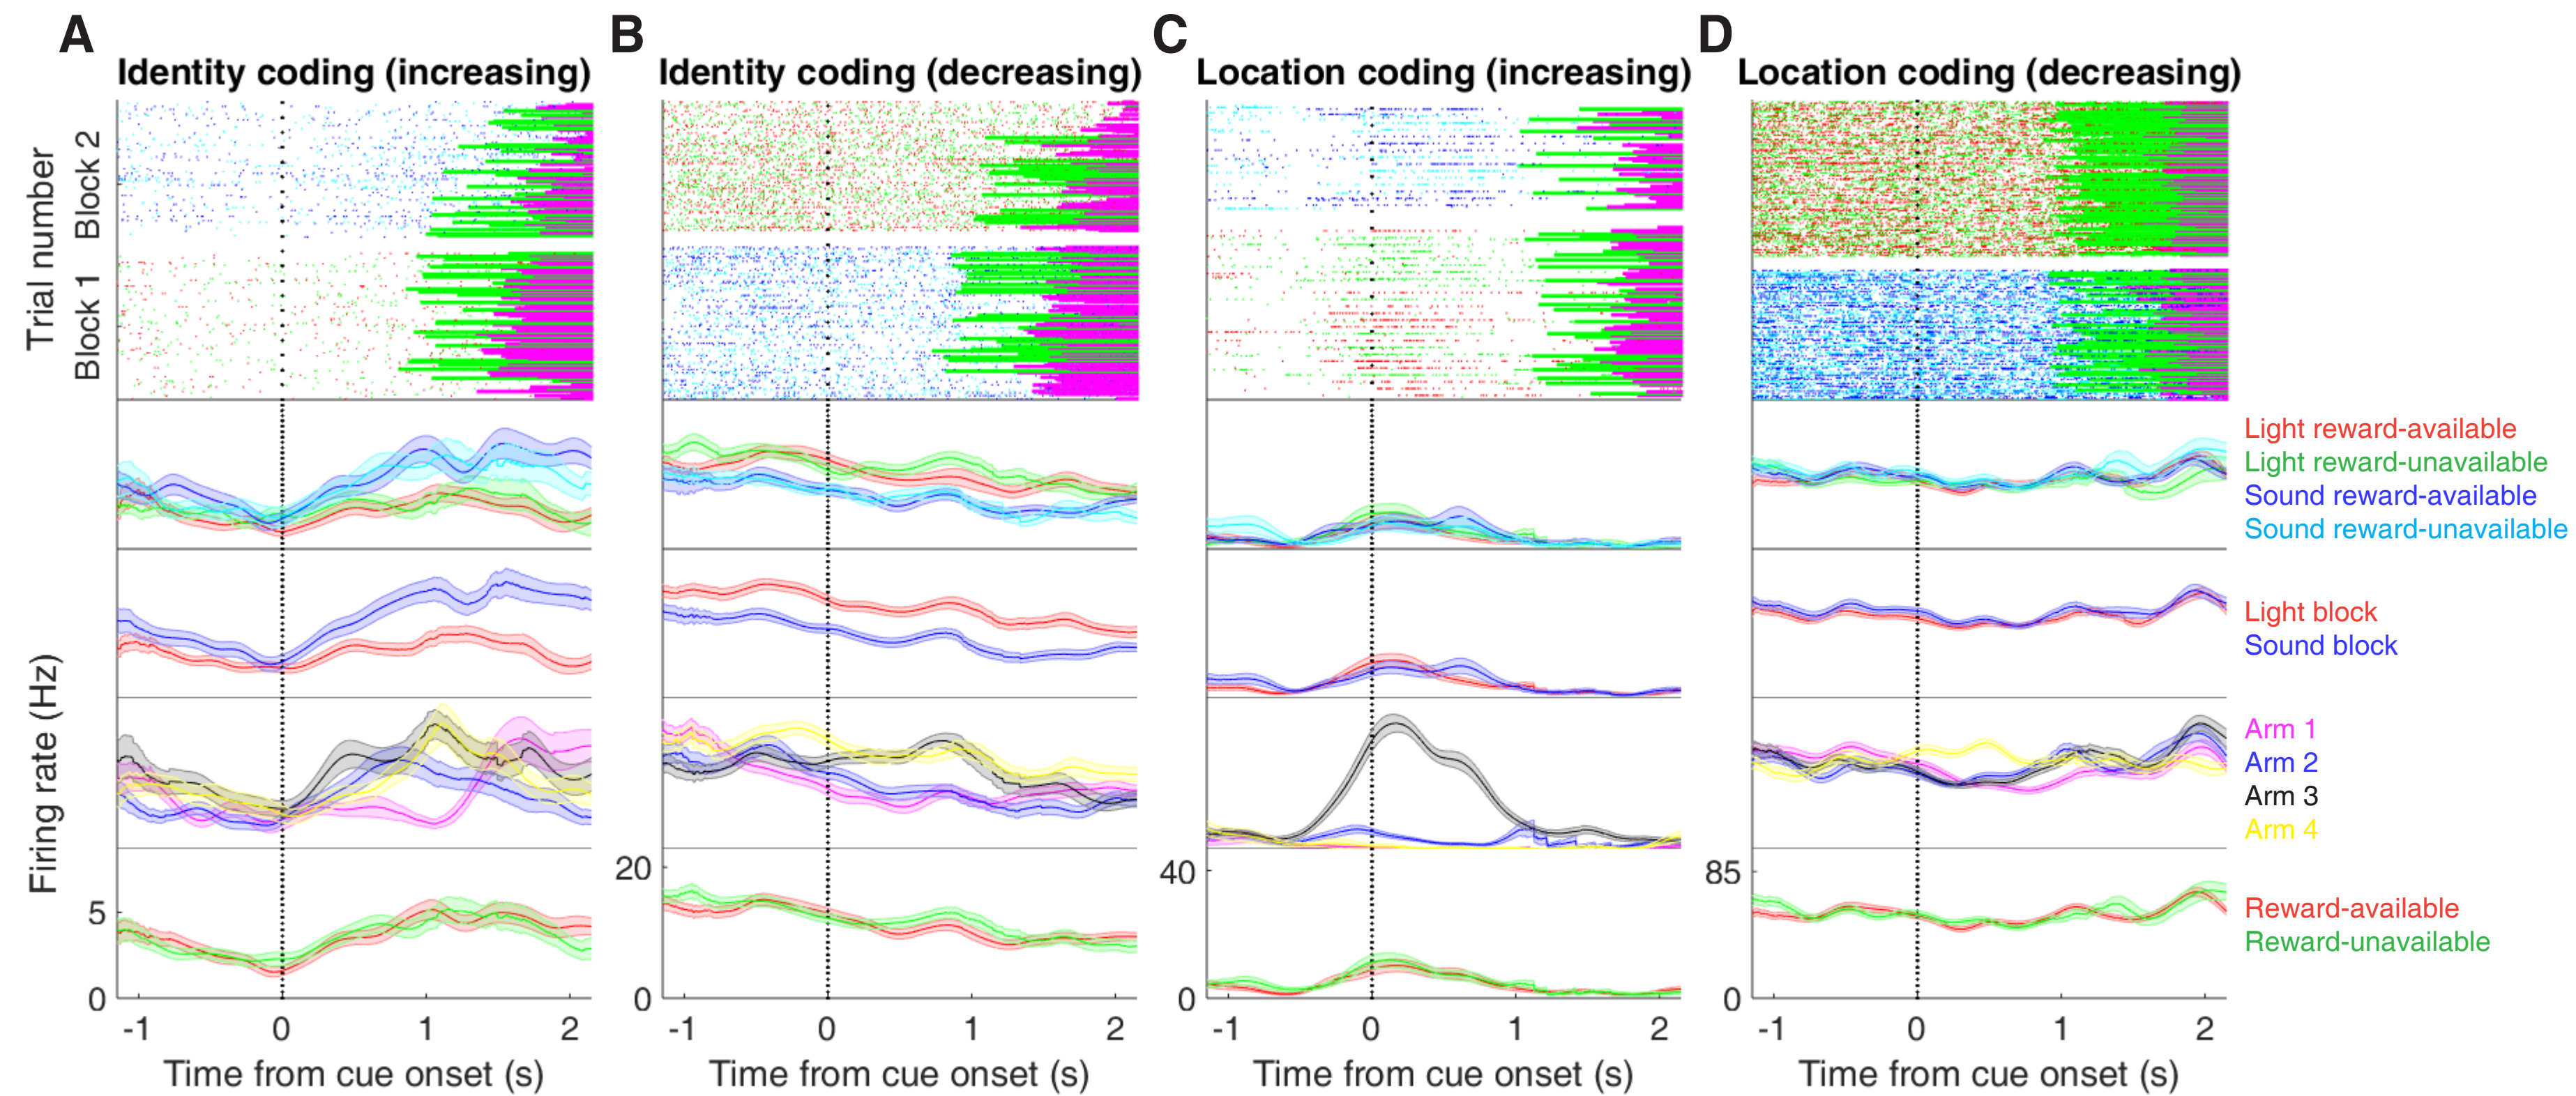

Supplement: supp [file elife_poa_e37275_Figure_3_figure_supplement_1.pdf › elife_poa_e37275_Figure_3_figure_supplement_1.pdf]

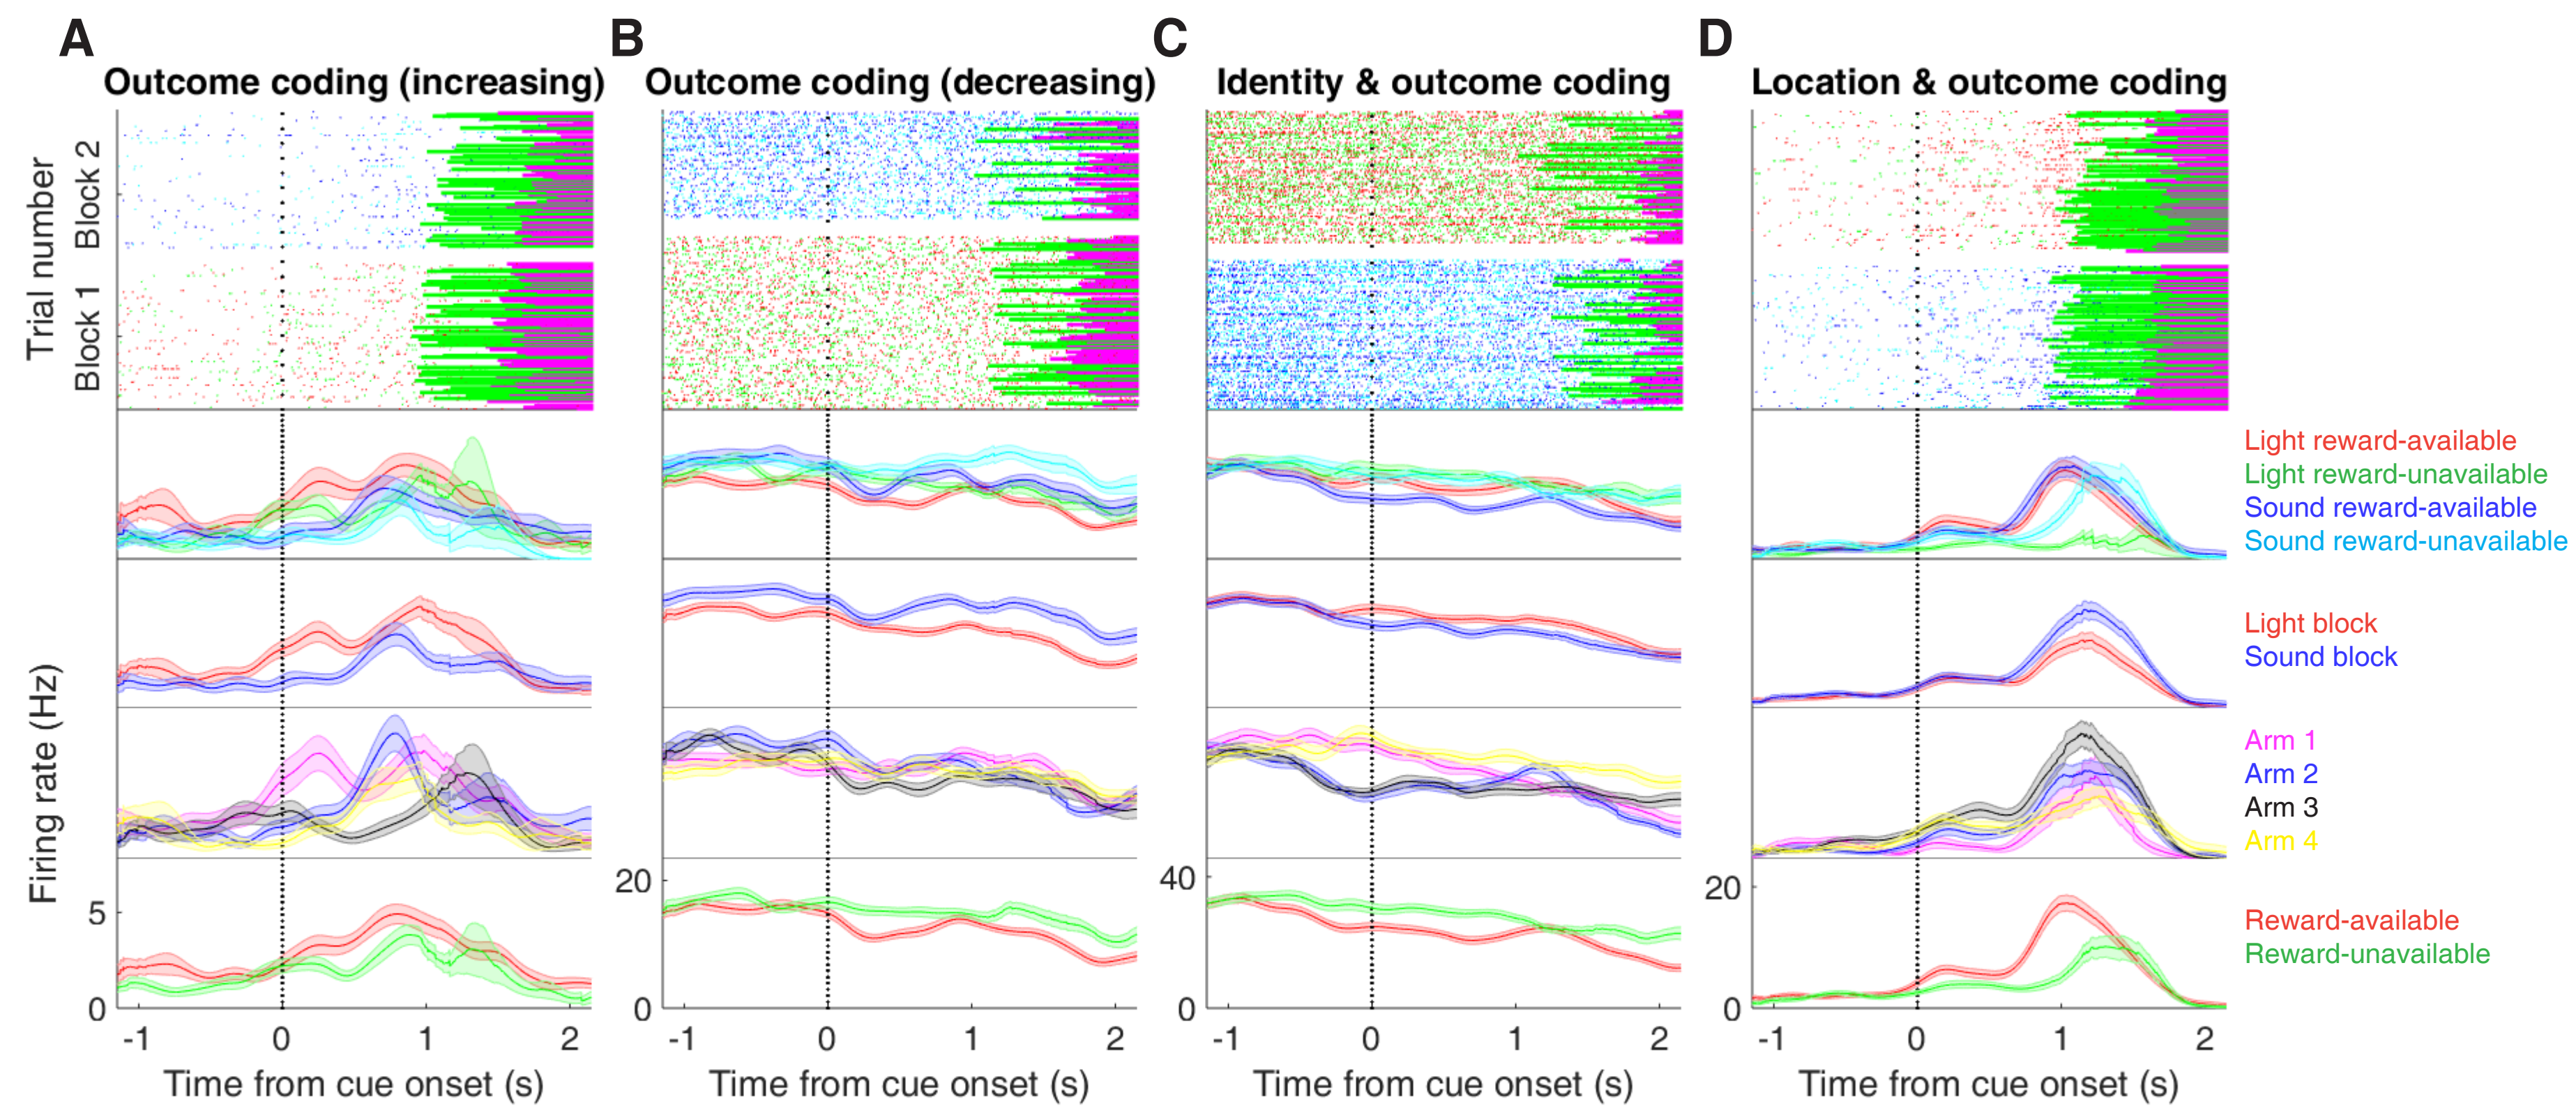

Supplement: supp [file elife_poa_e37275_Figure_3_figure_supplement_2.pdf › elife_poa_e37275_Figure_3_figure_supplement_2.pdf]

**A**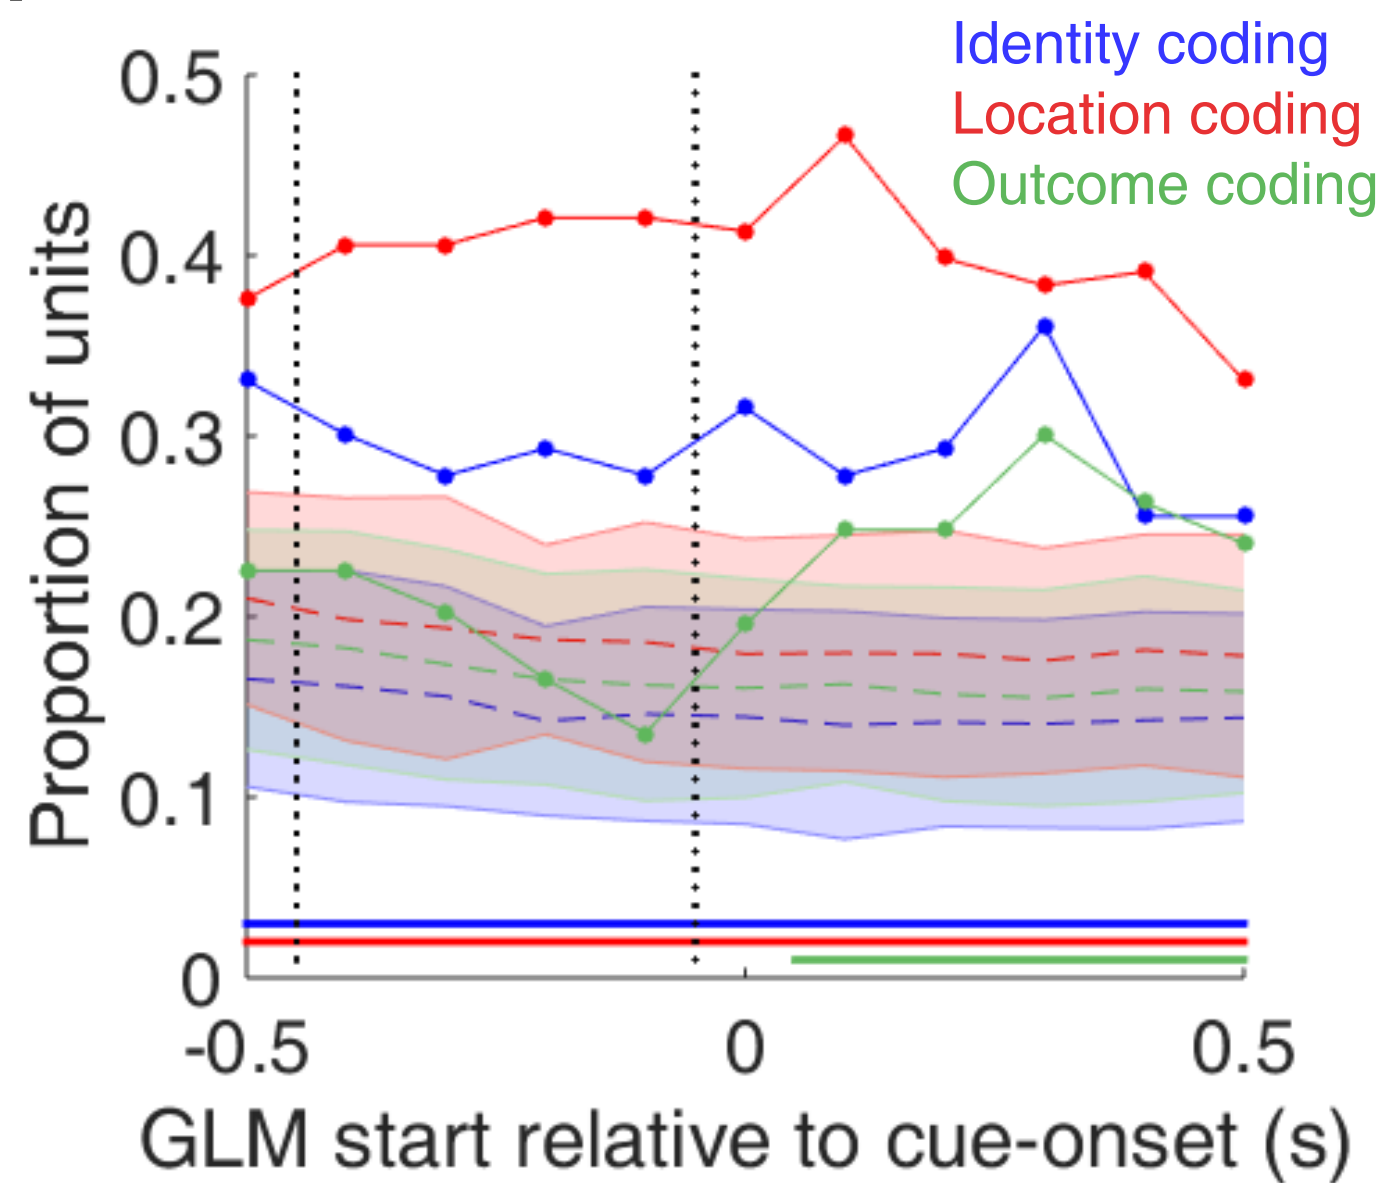**B**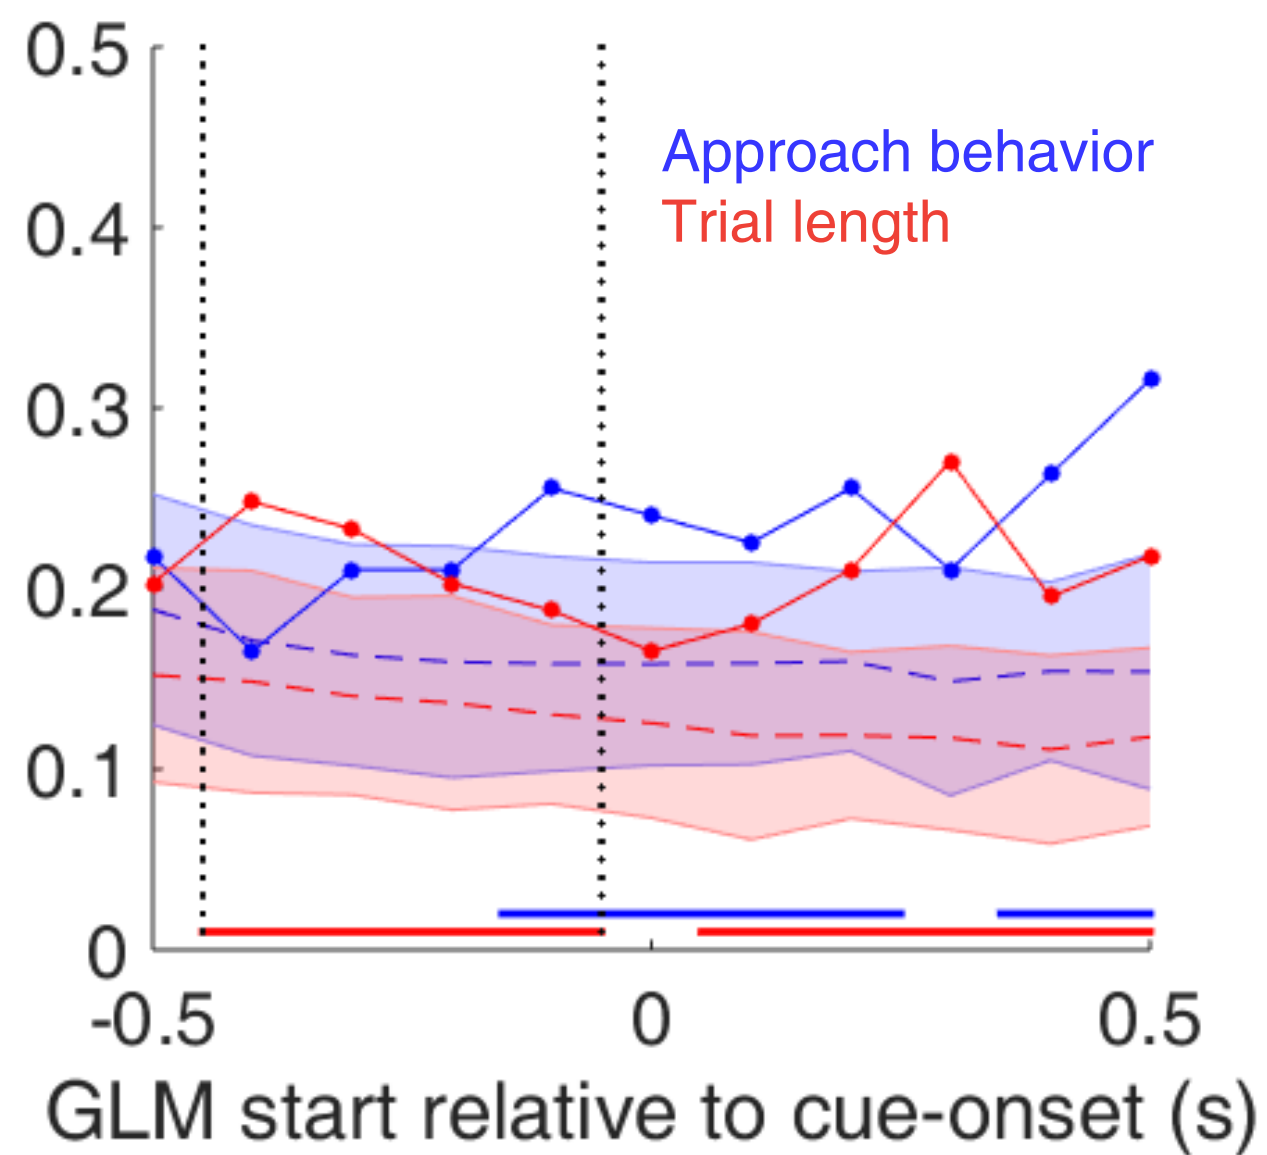**C**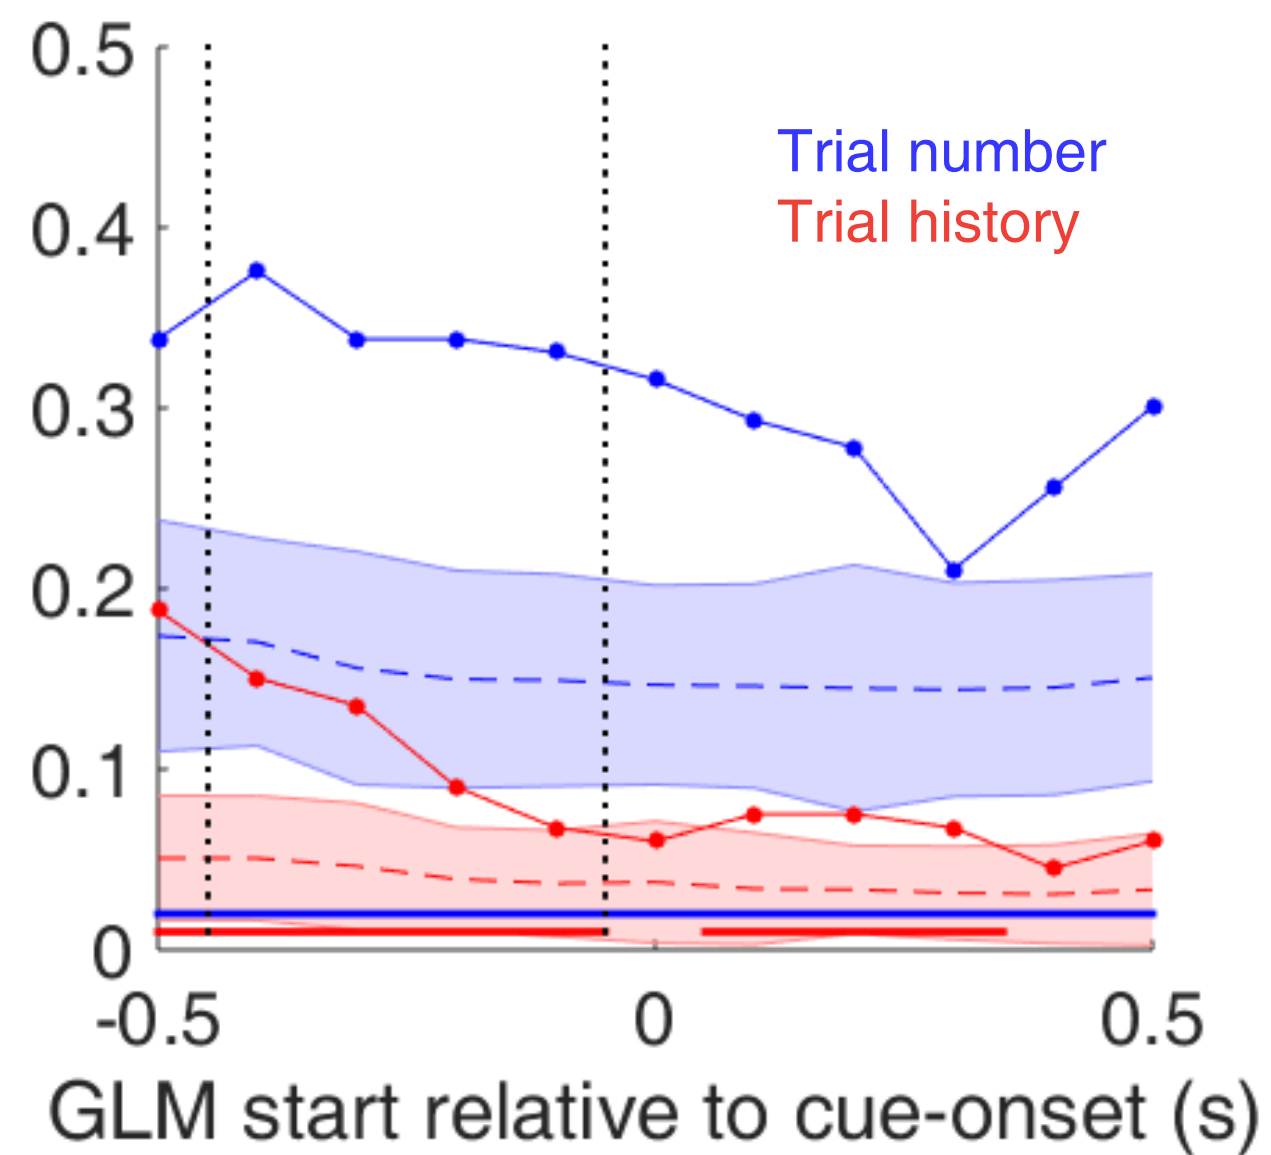**D**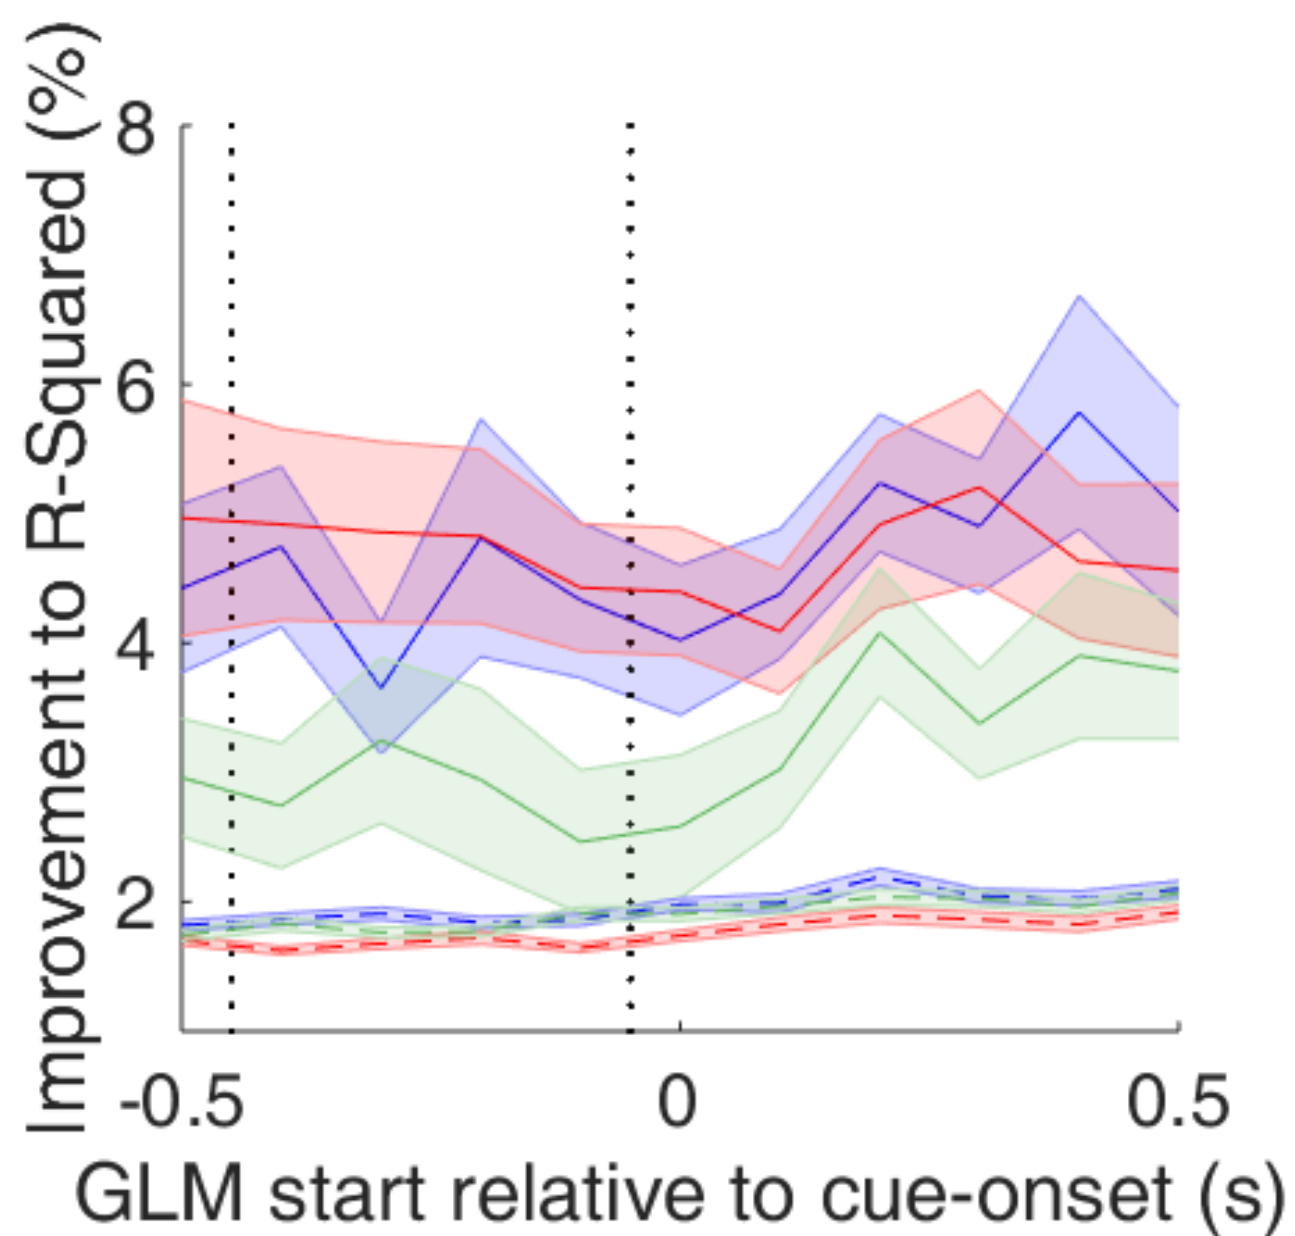**E**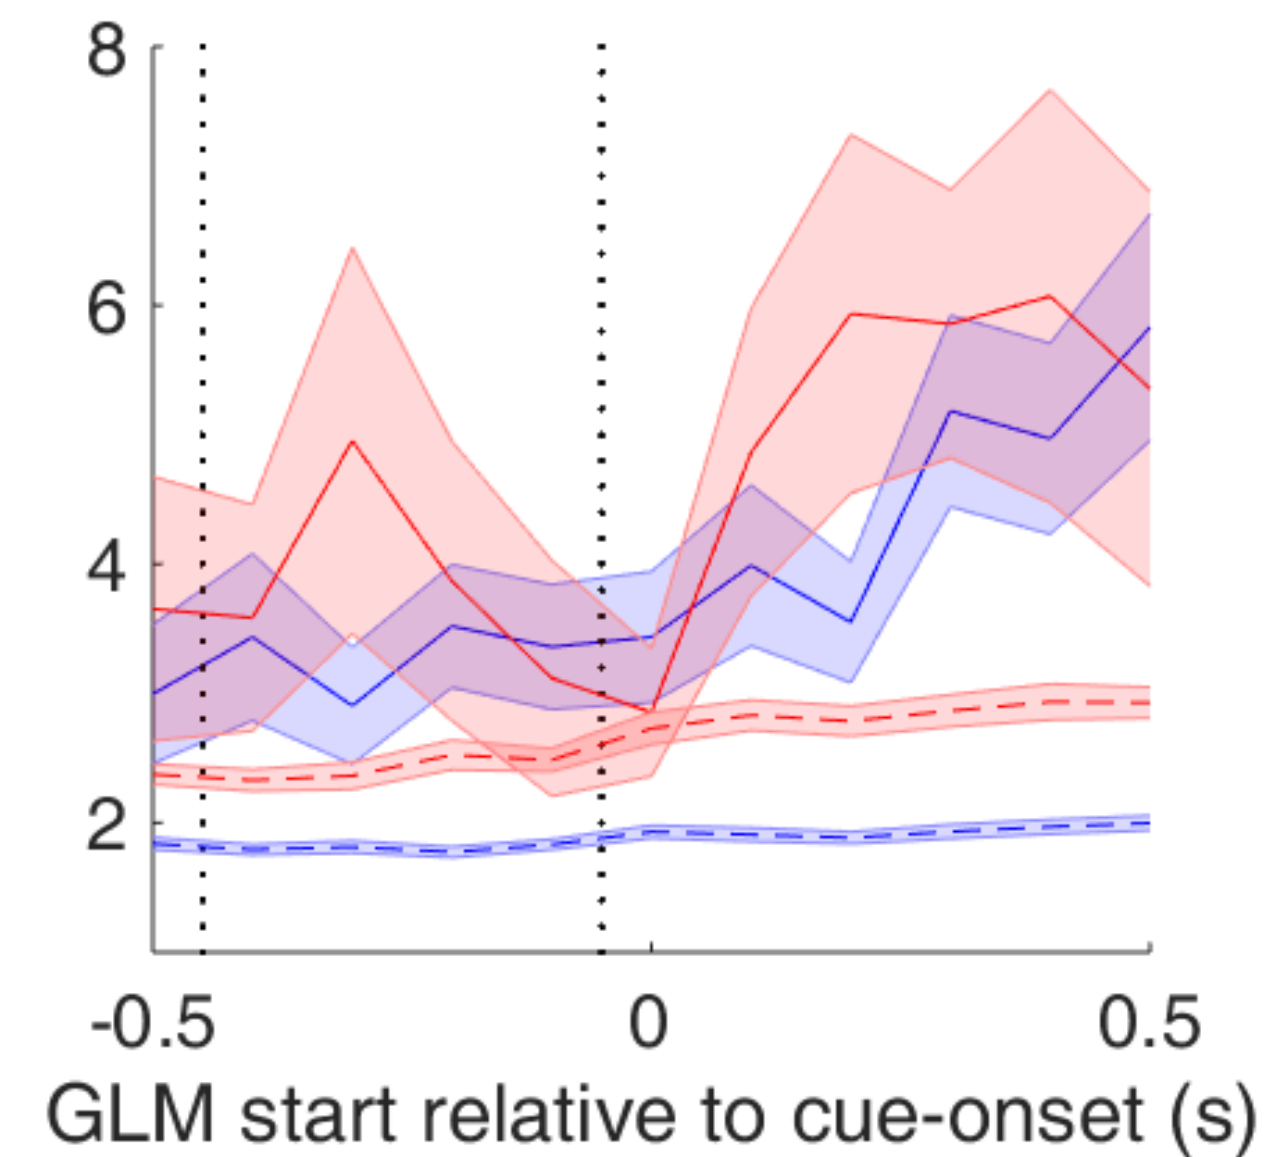**F**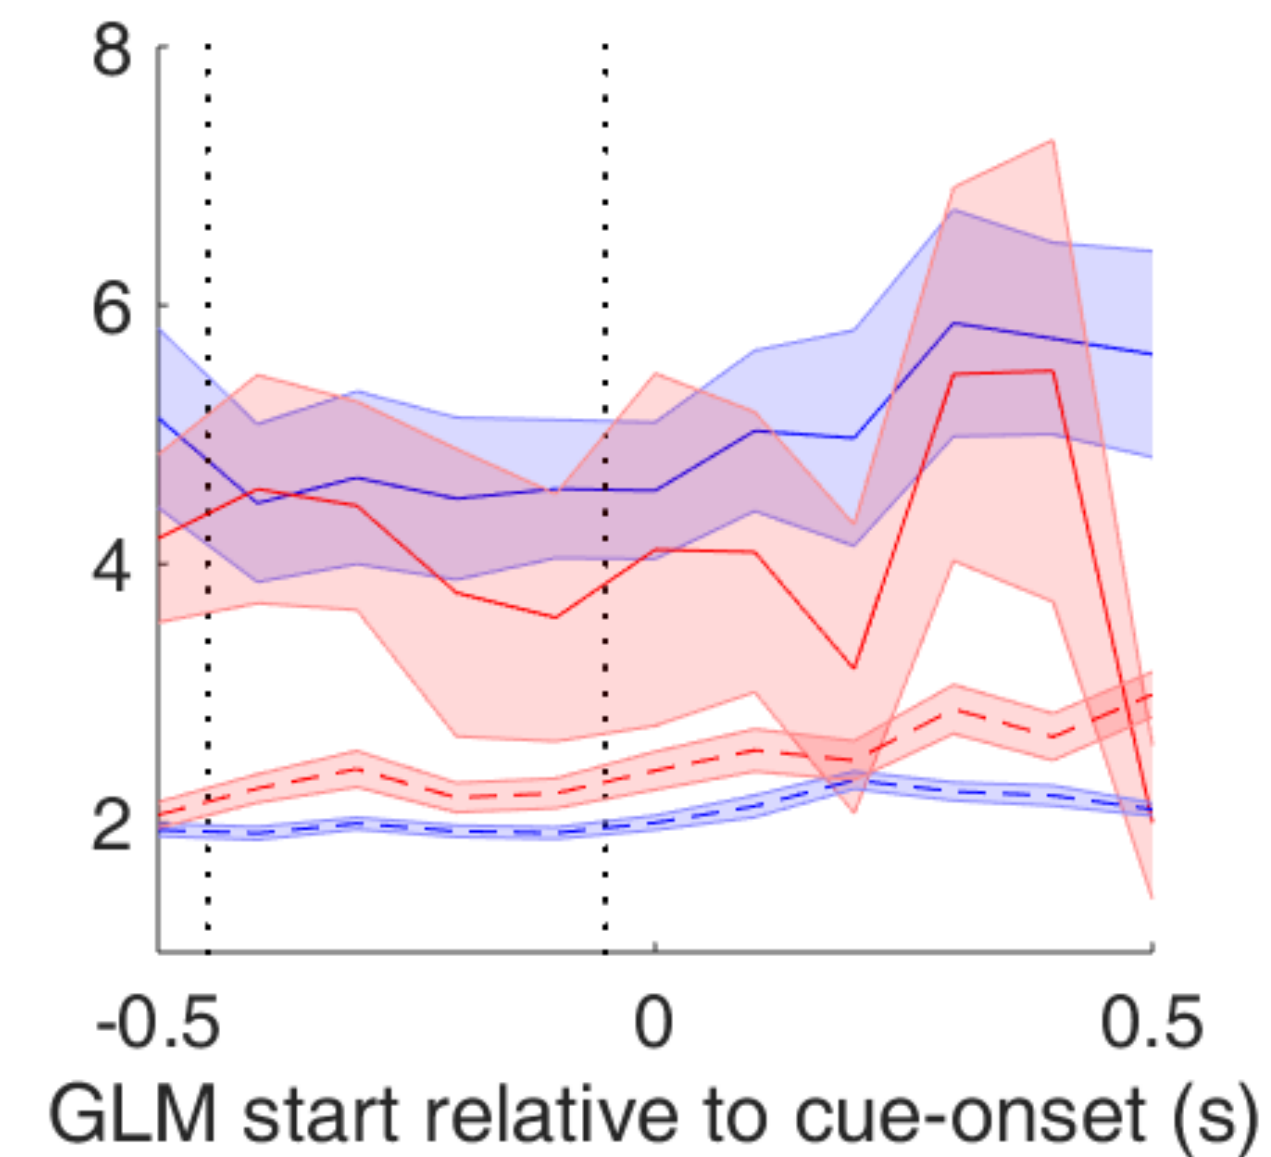

Supplement: supp [file elife_poa_e37275_Figure_4_figure_supplement_1.pdf › elife_poa_e37275_Figure_4_figure_supplement_1.pdf]

# Comparison across blocks

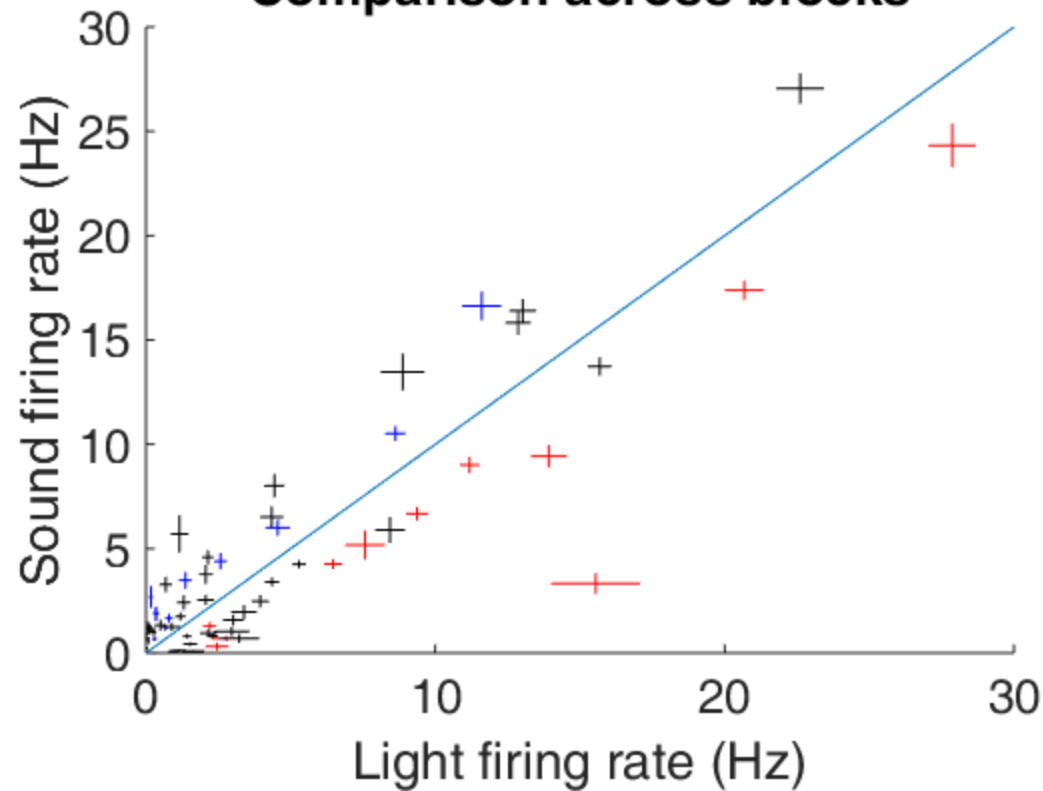

Supplement: supp [file elife_poa_e37275_Figure_4_figure_supplement_2.pdf › elife_poa_e37275_Figure_4_figure_supplement_2.pdf]

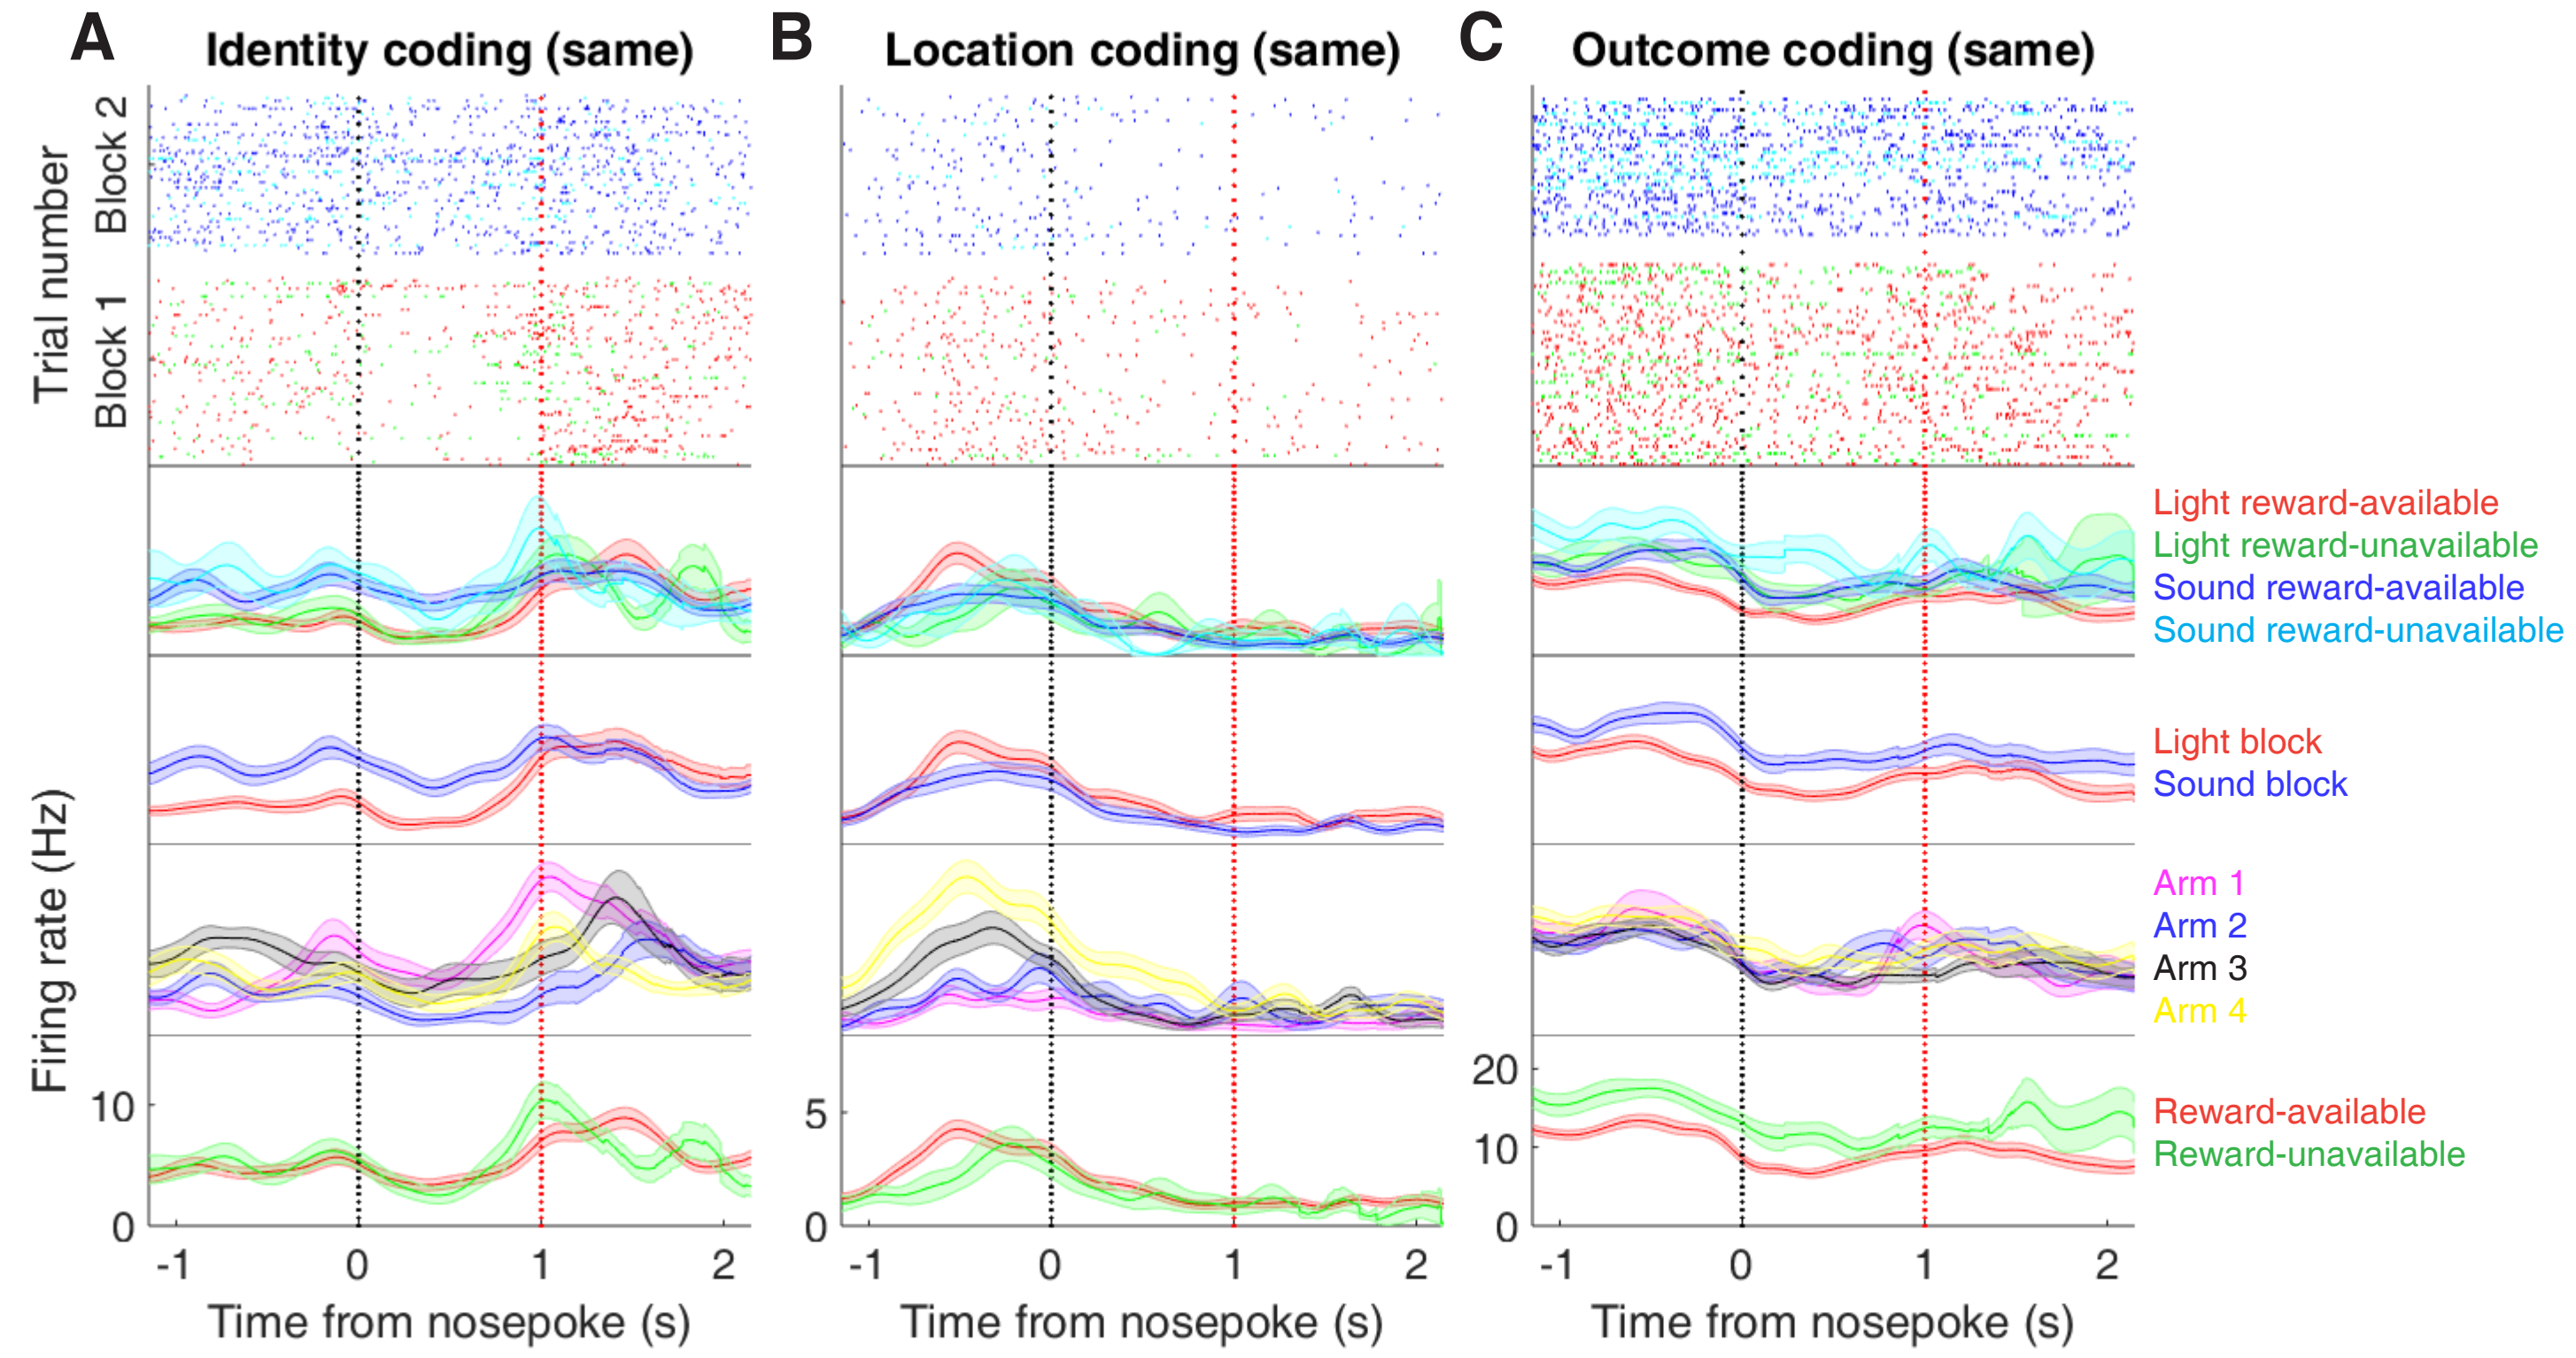

Supplement: supp [file elife_poa_e37275_Figure_6_figure_supplement_1.pdf › elife_poa_e37275_Figure_6_figure_supplement_1.pdf]

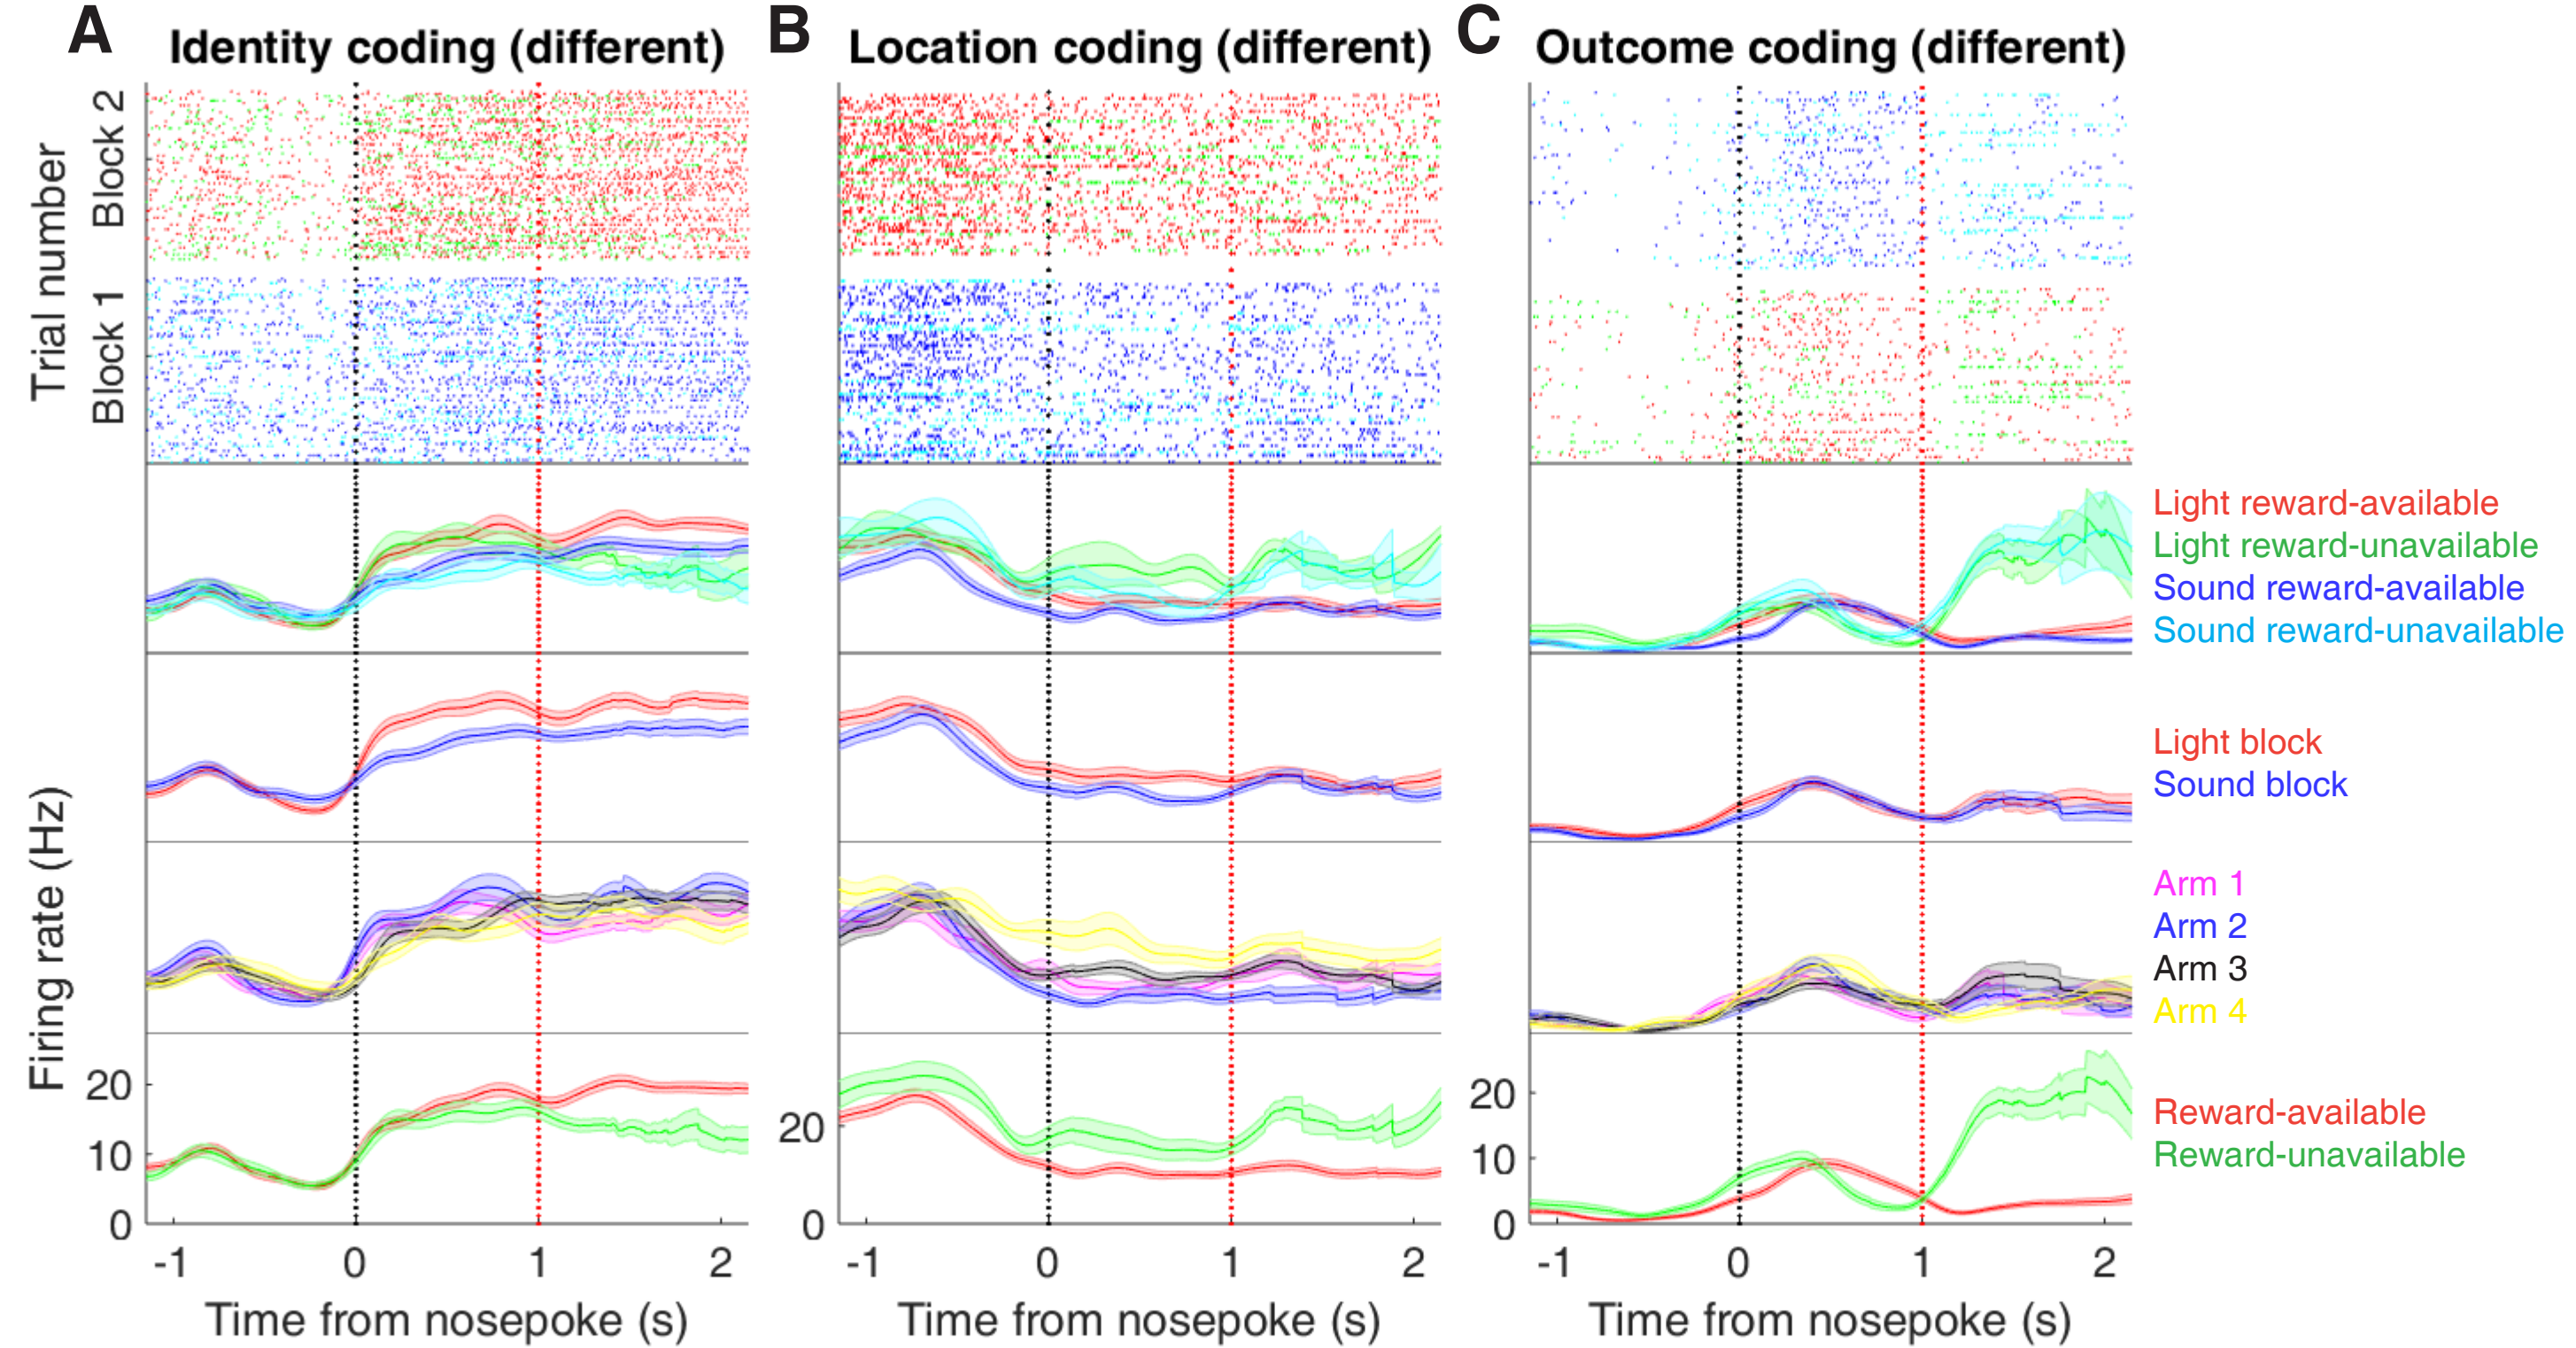

Supplement: supp [file elife_poa_e37275_Figure_6_figure_supplement_2.pdf › elife_poa_e37275_Figure_6_figure_supplement_2.pdf]

**A**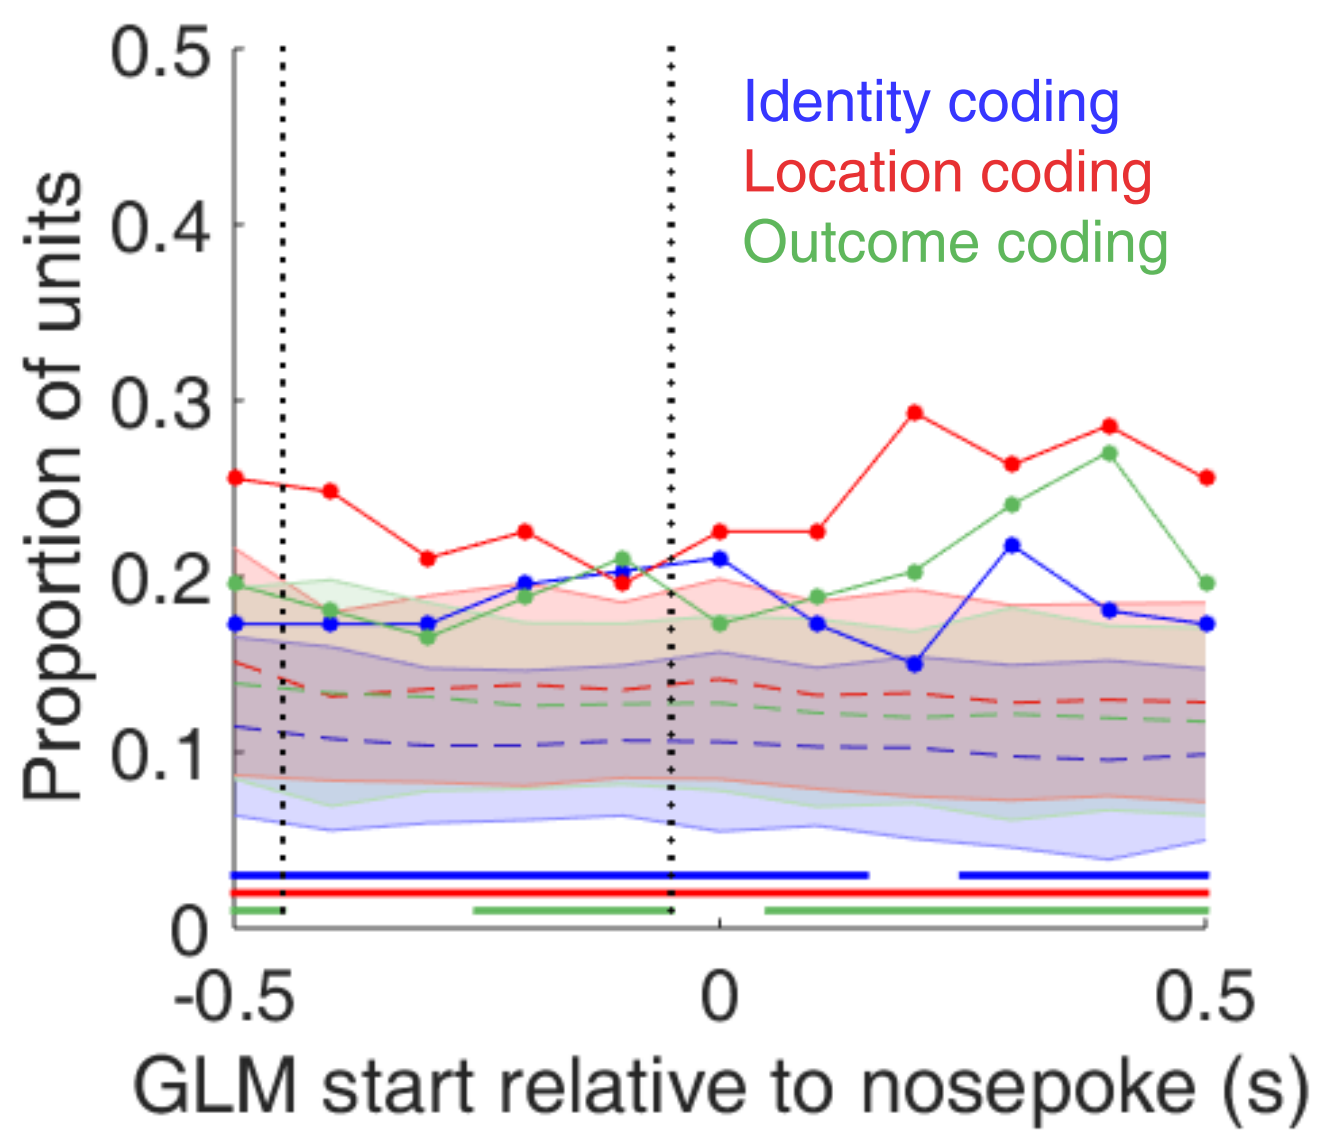**B**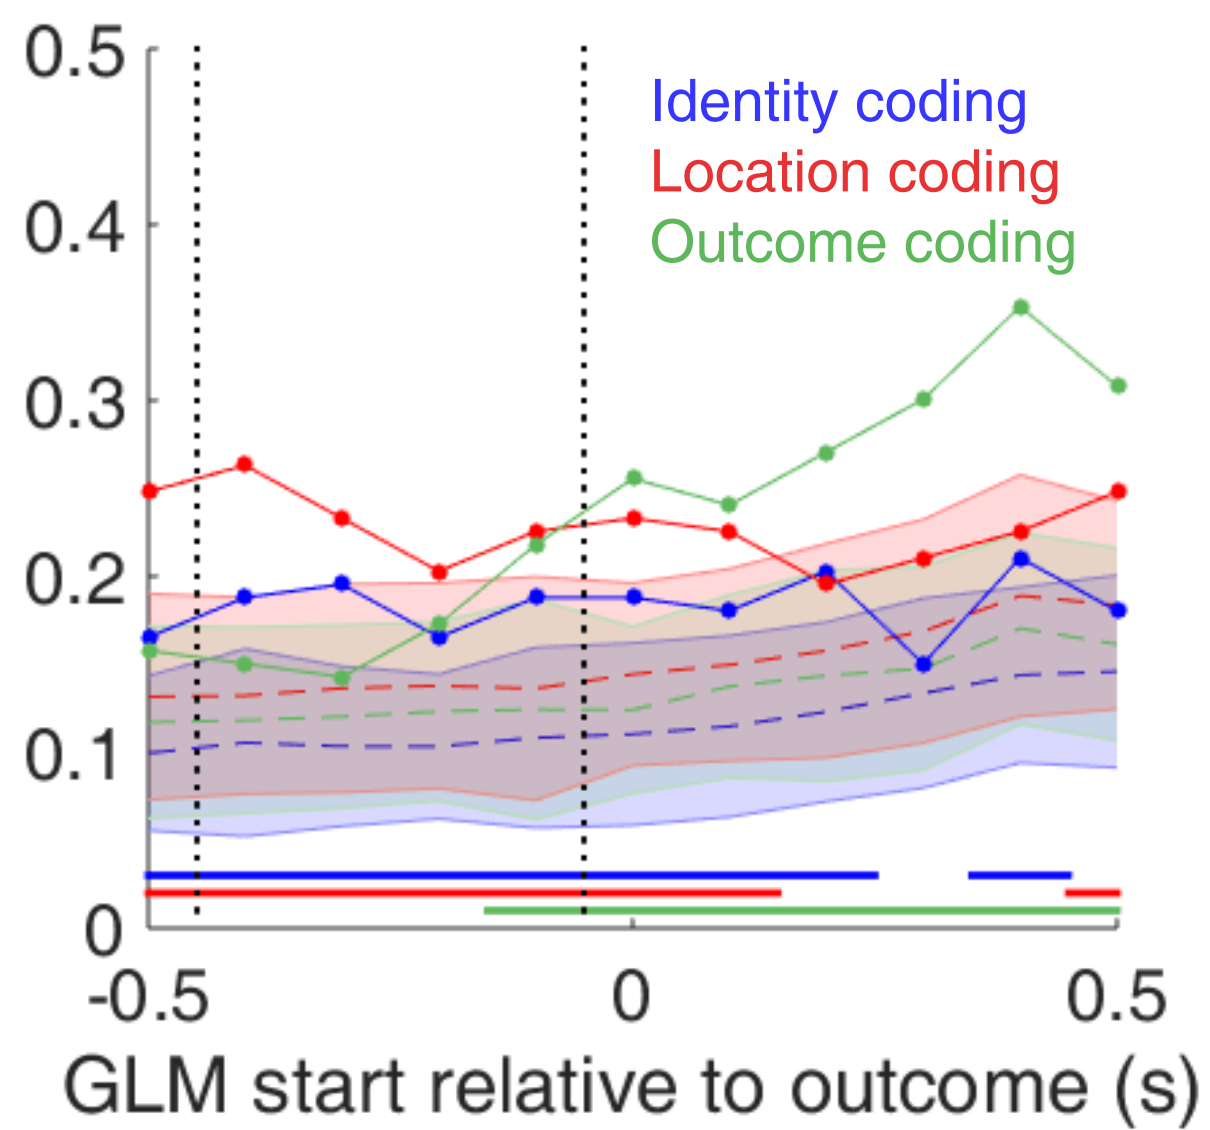**C**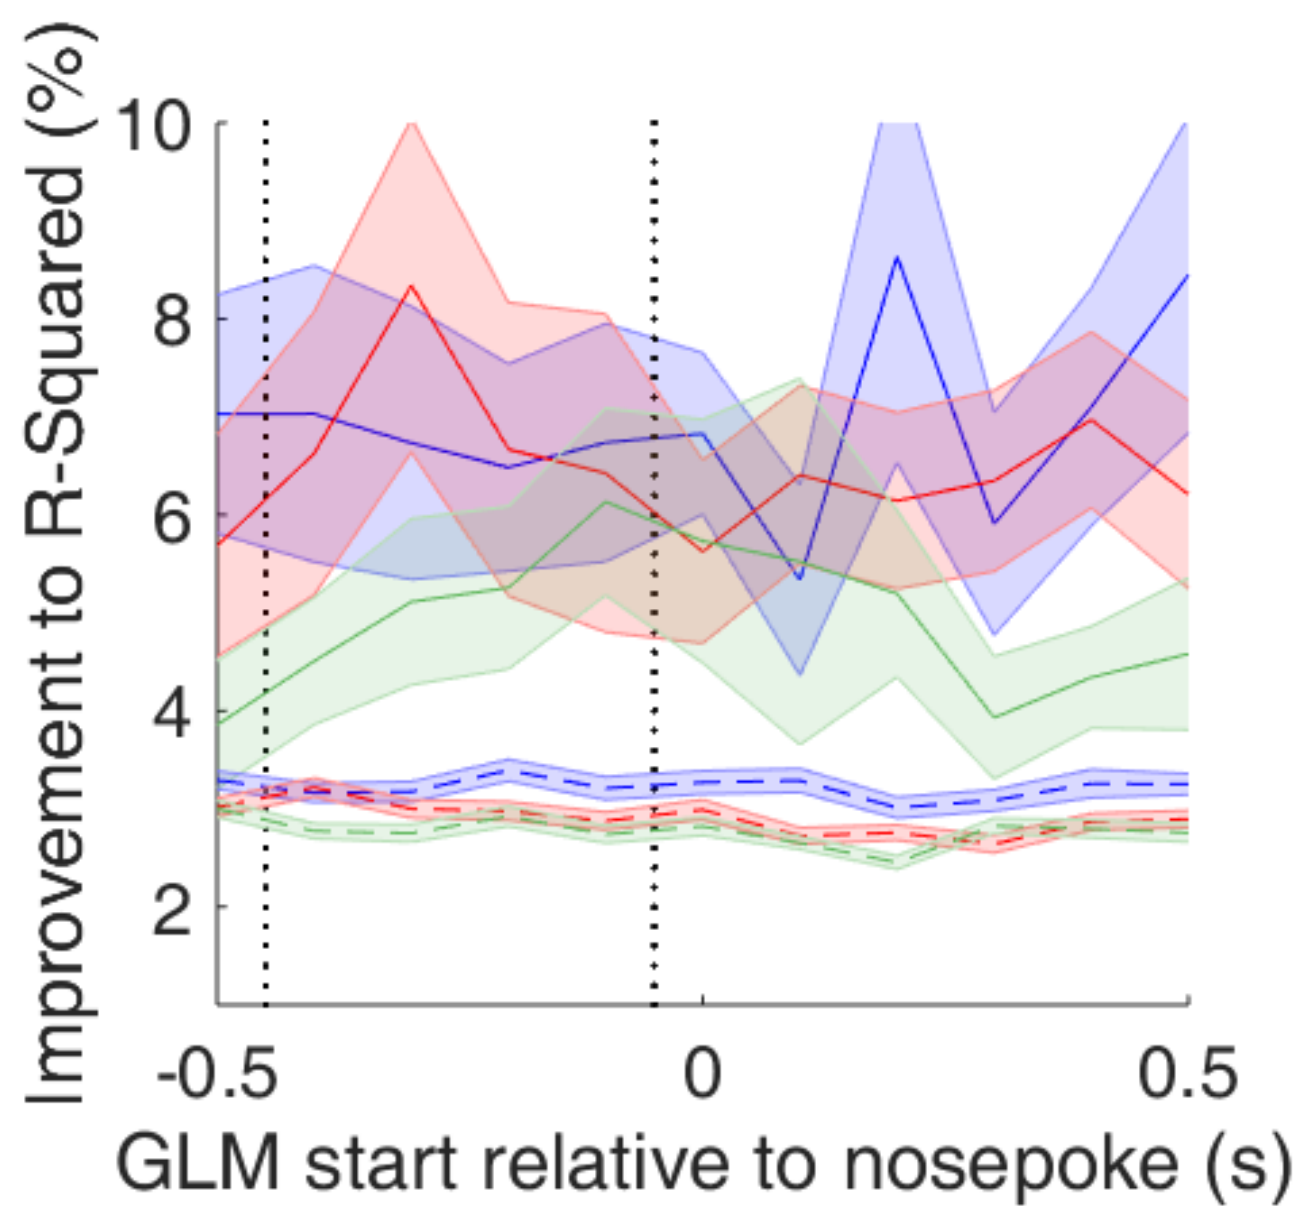**D**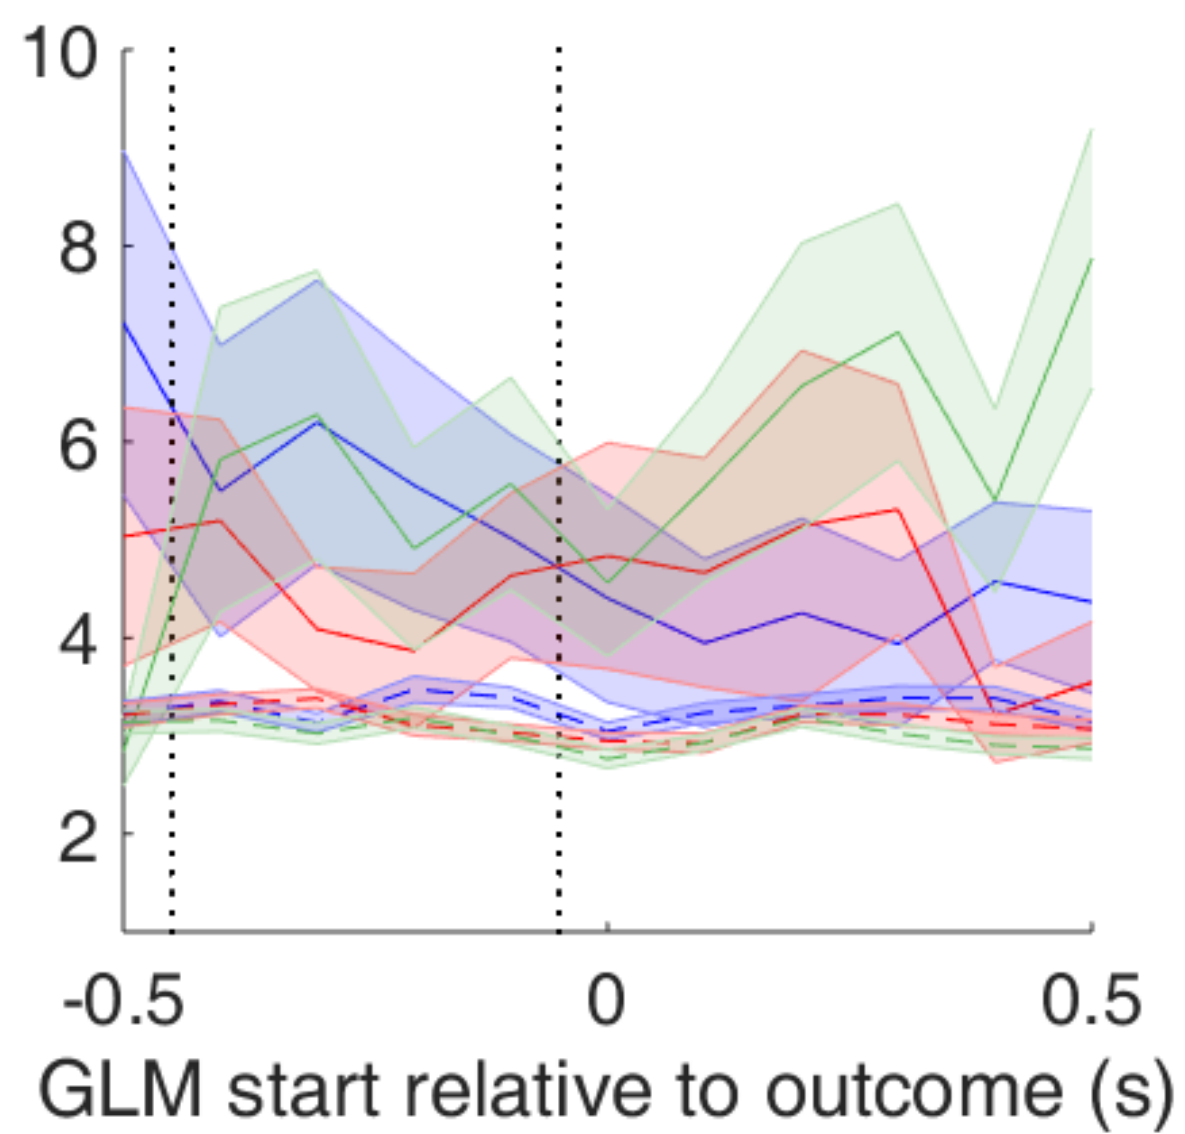**E**

Coding of cue features at nosepoke

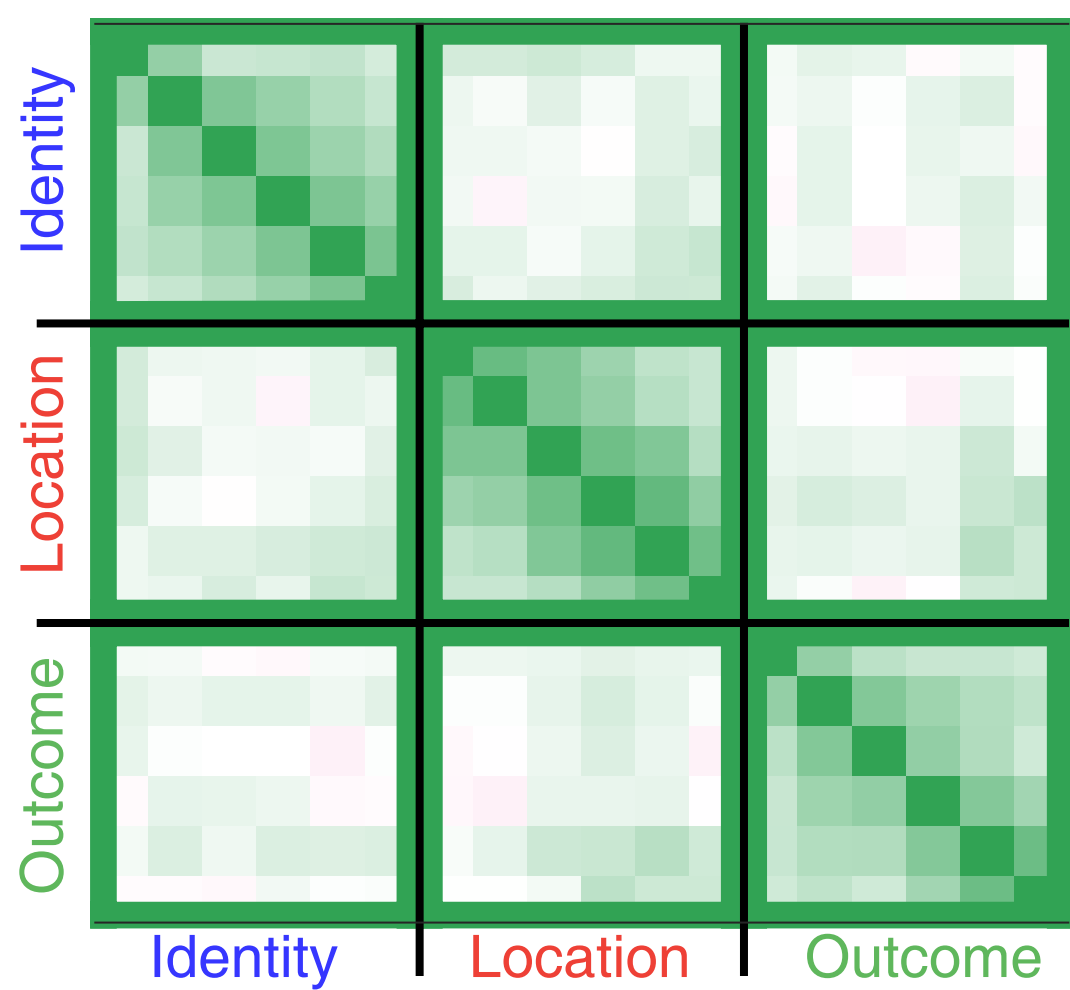**F**

Coding of cue features at outcome

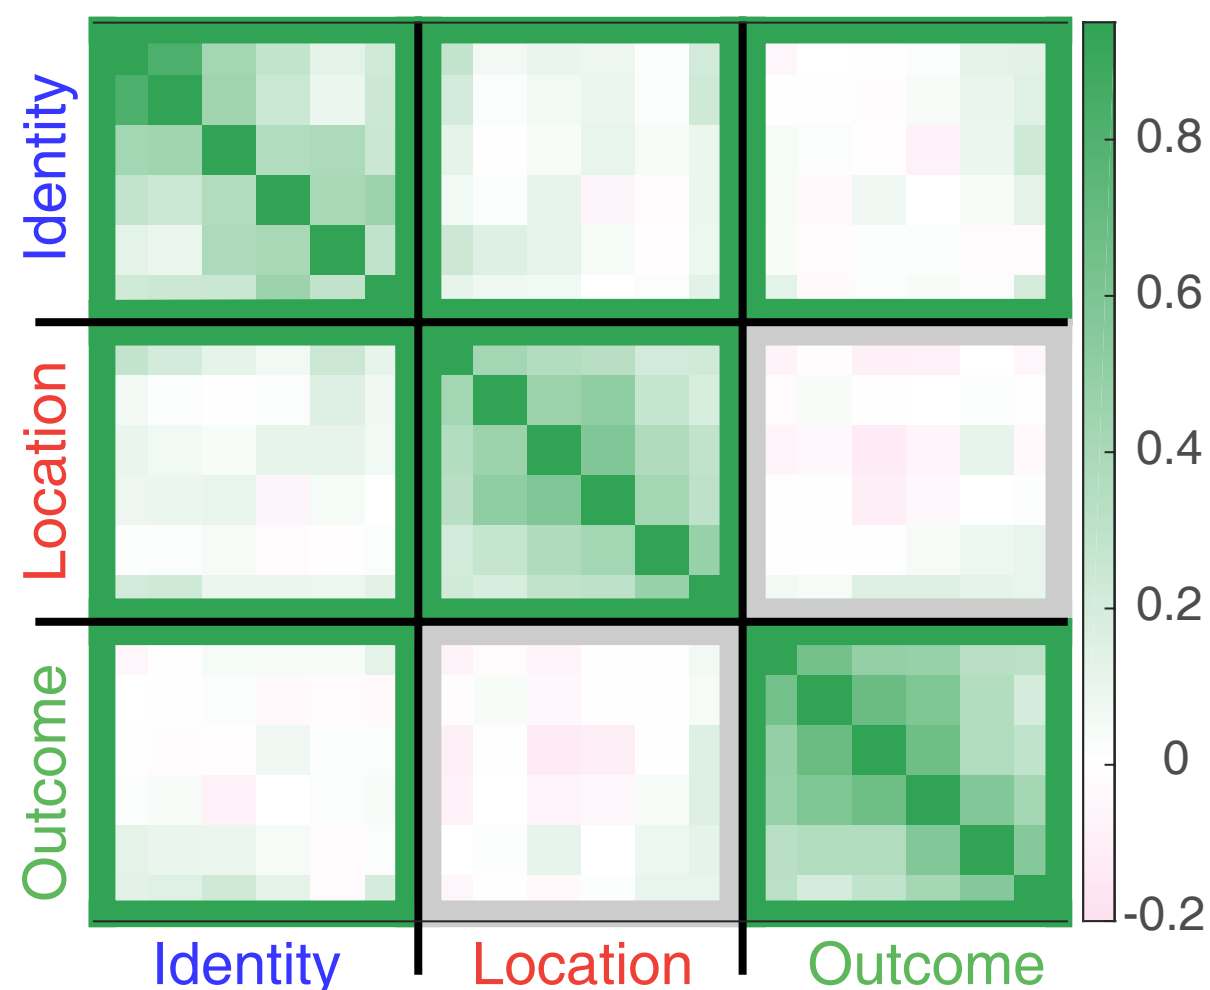

200 ms

Supplement: supp [file elife_poa_e37275_Figure_7_figure_supplement_1.pdf › elife_poa_e37275_Figure_7_figure_supplement_1.pdf]

n = 443

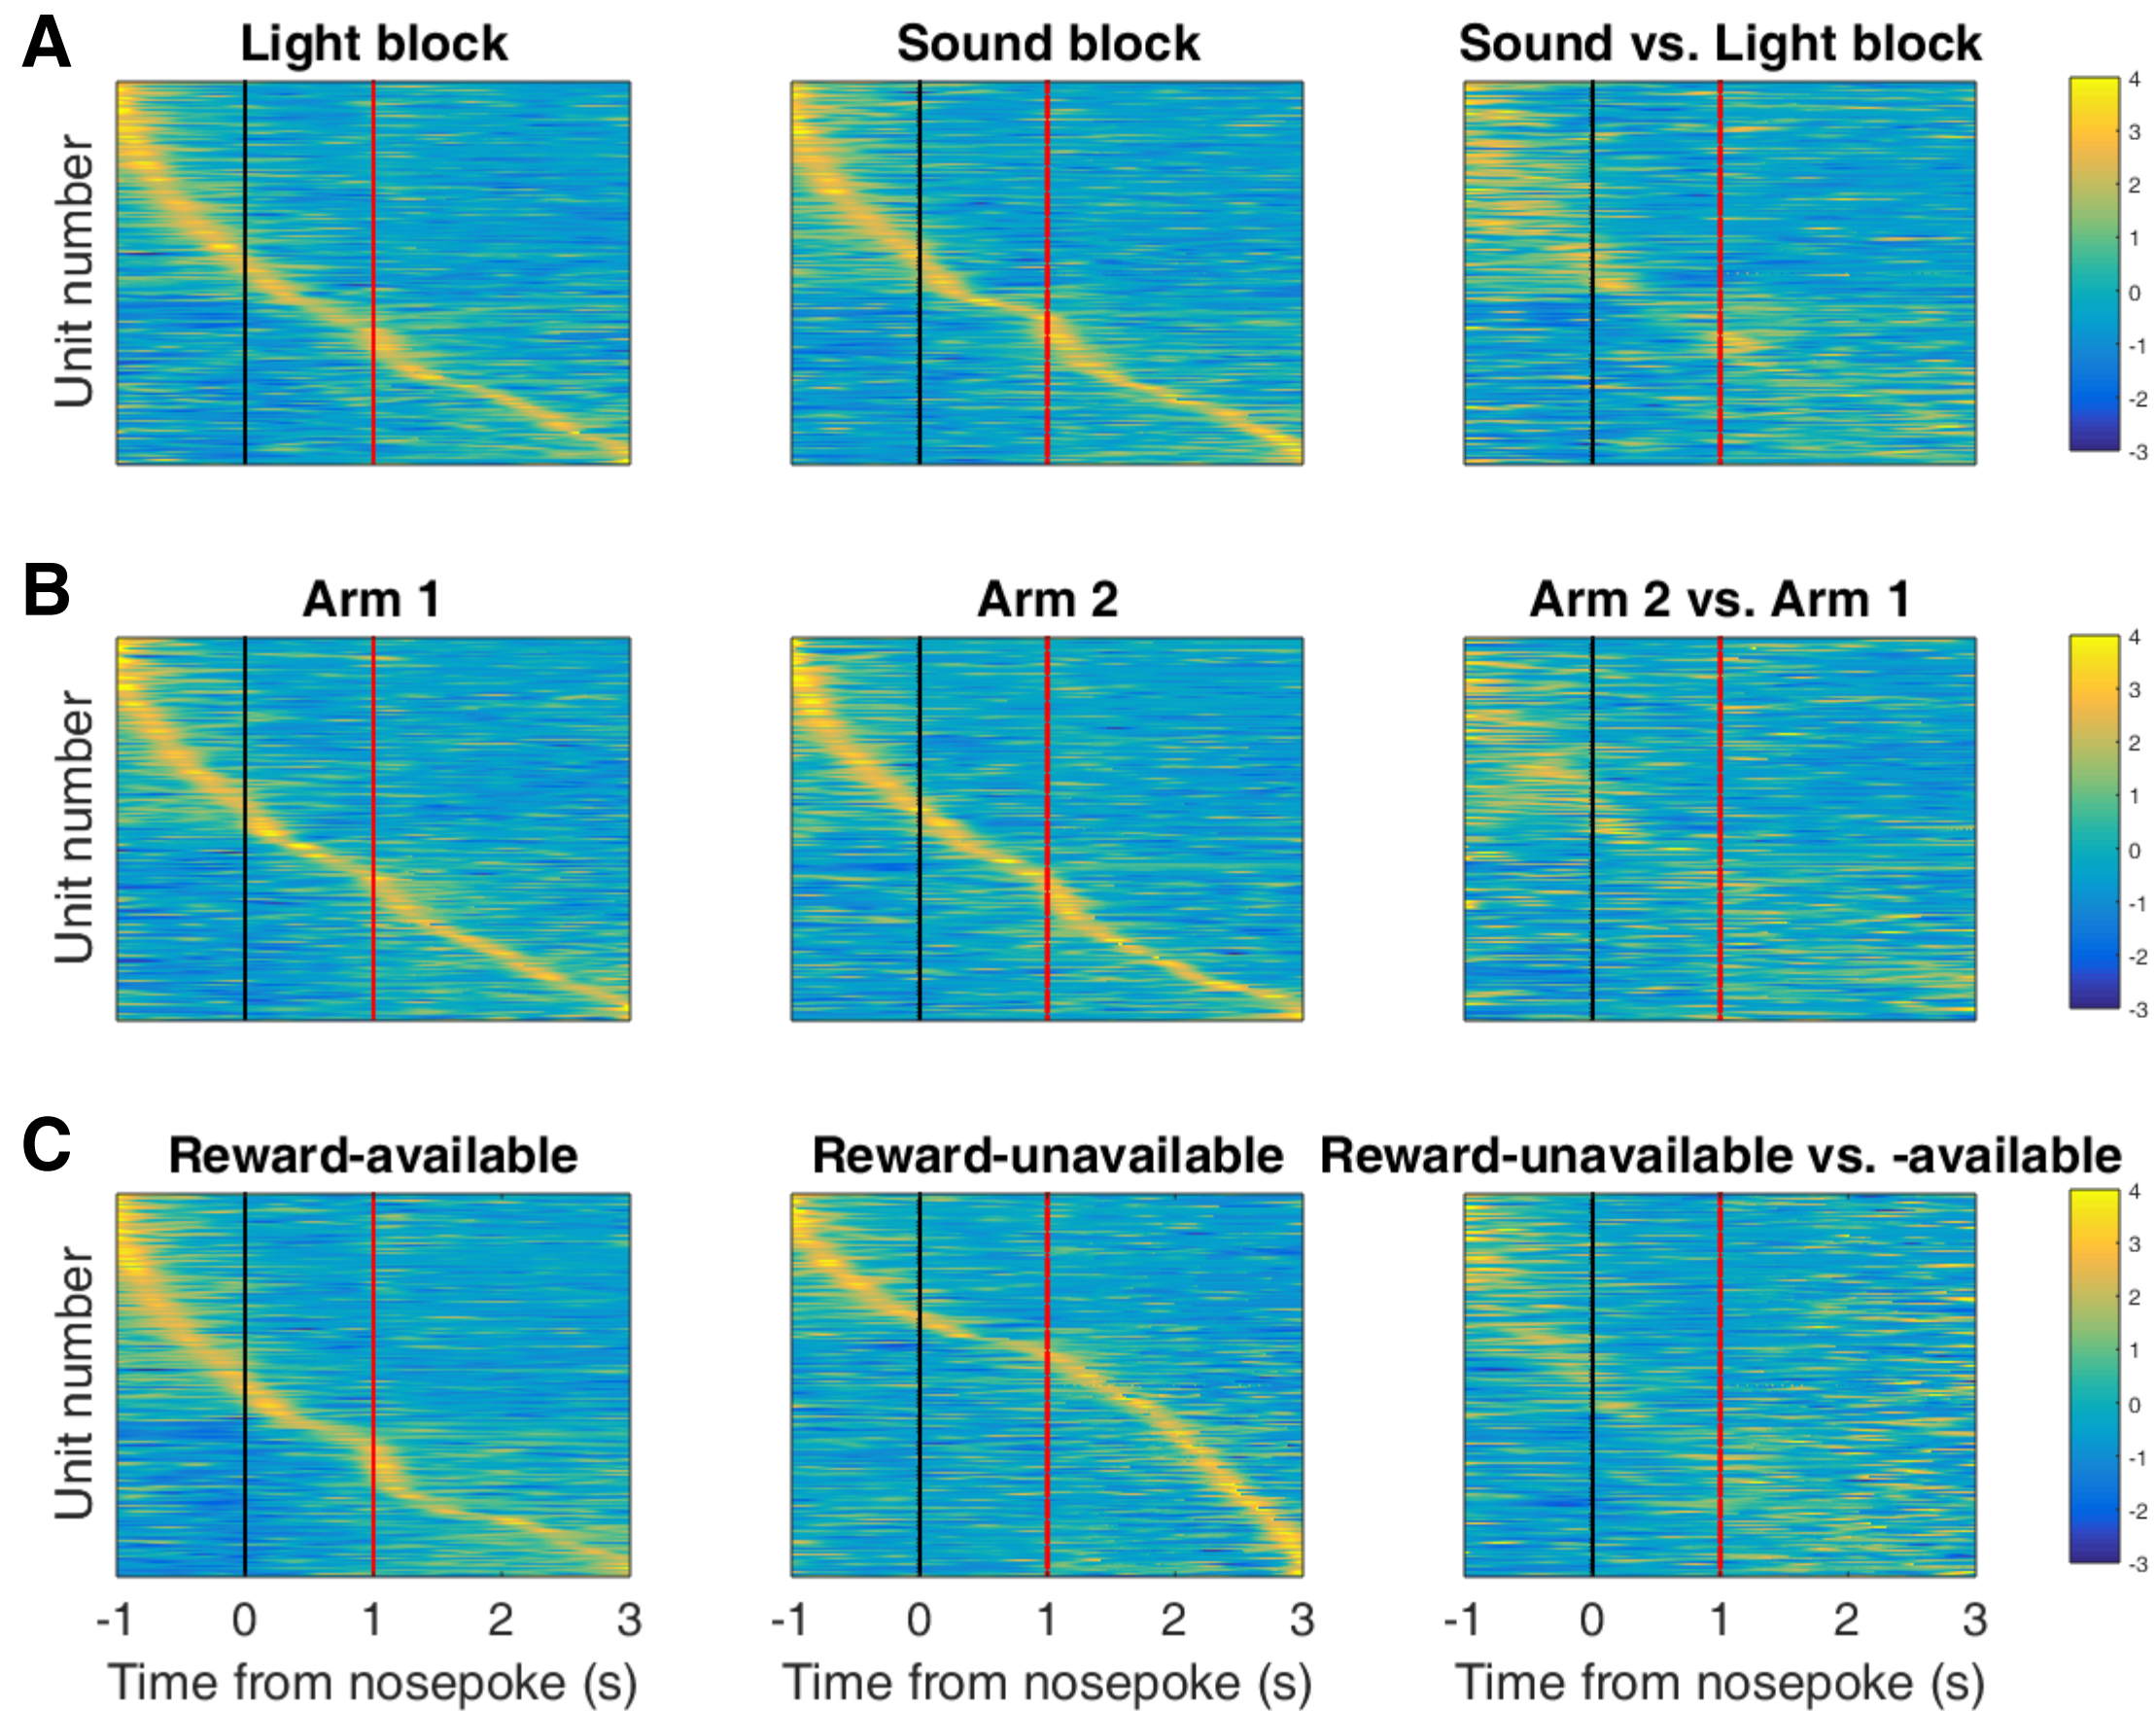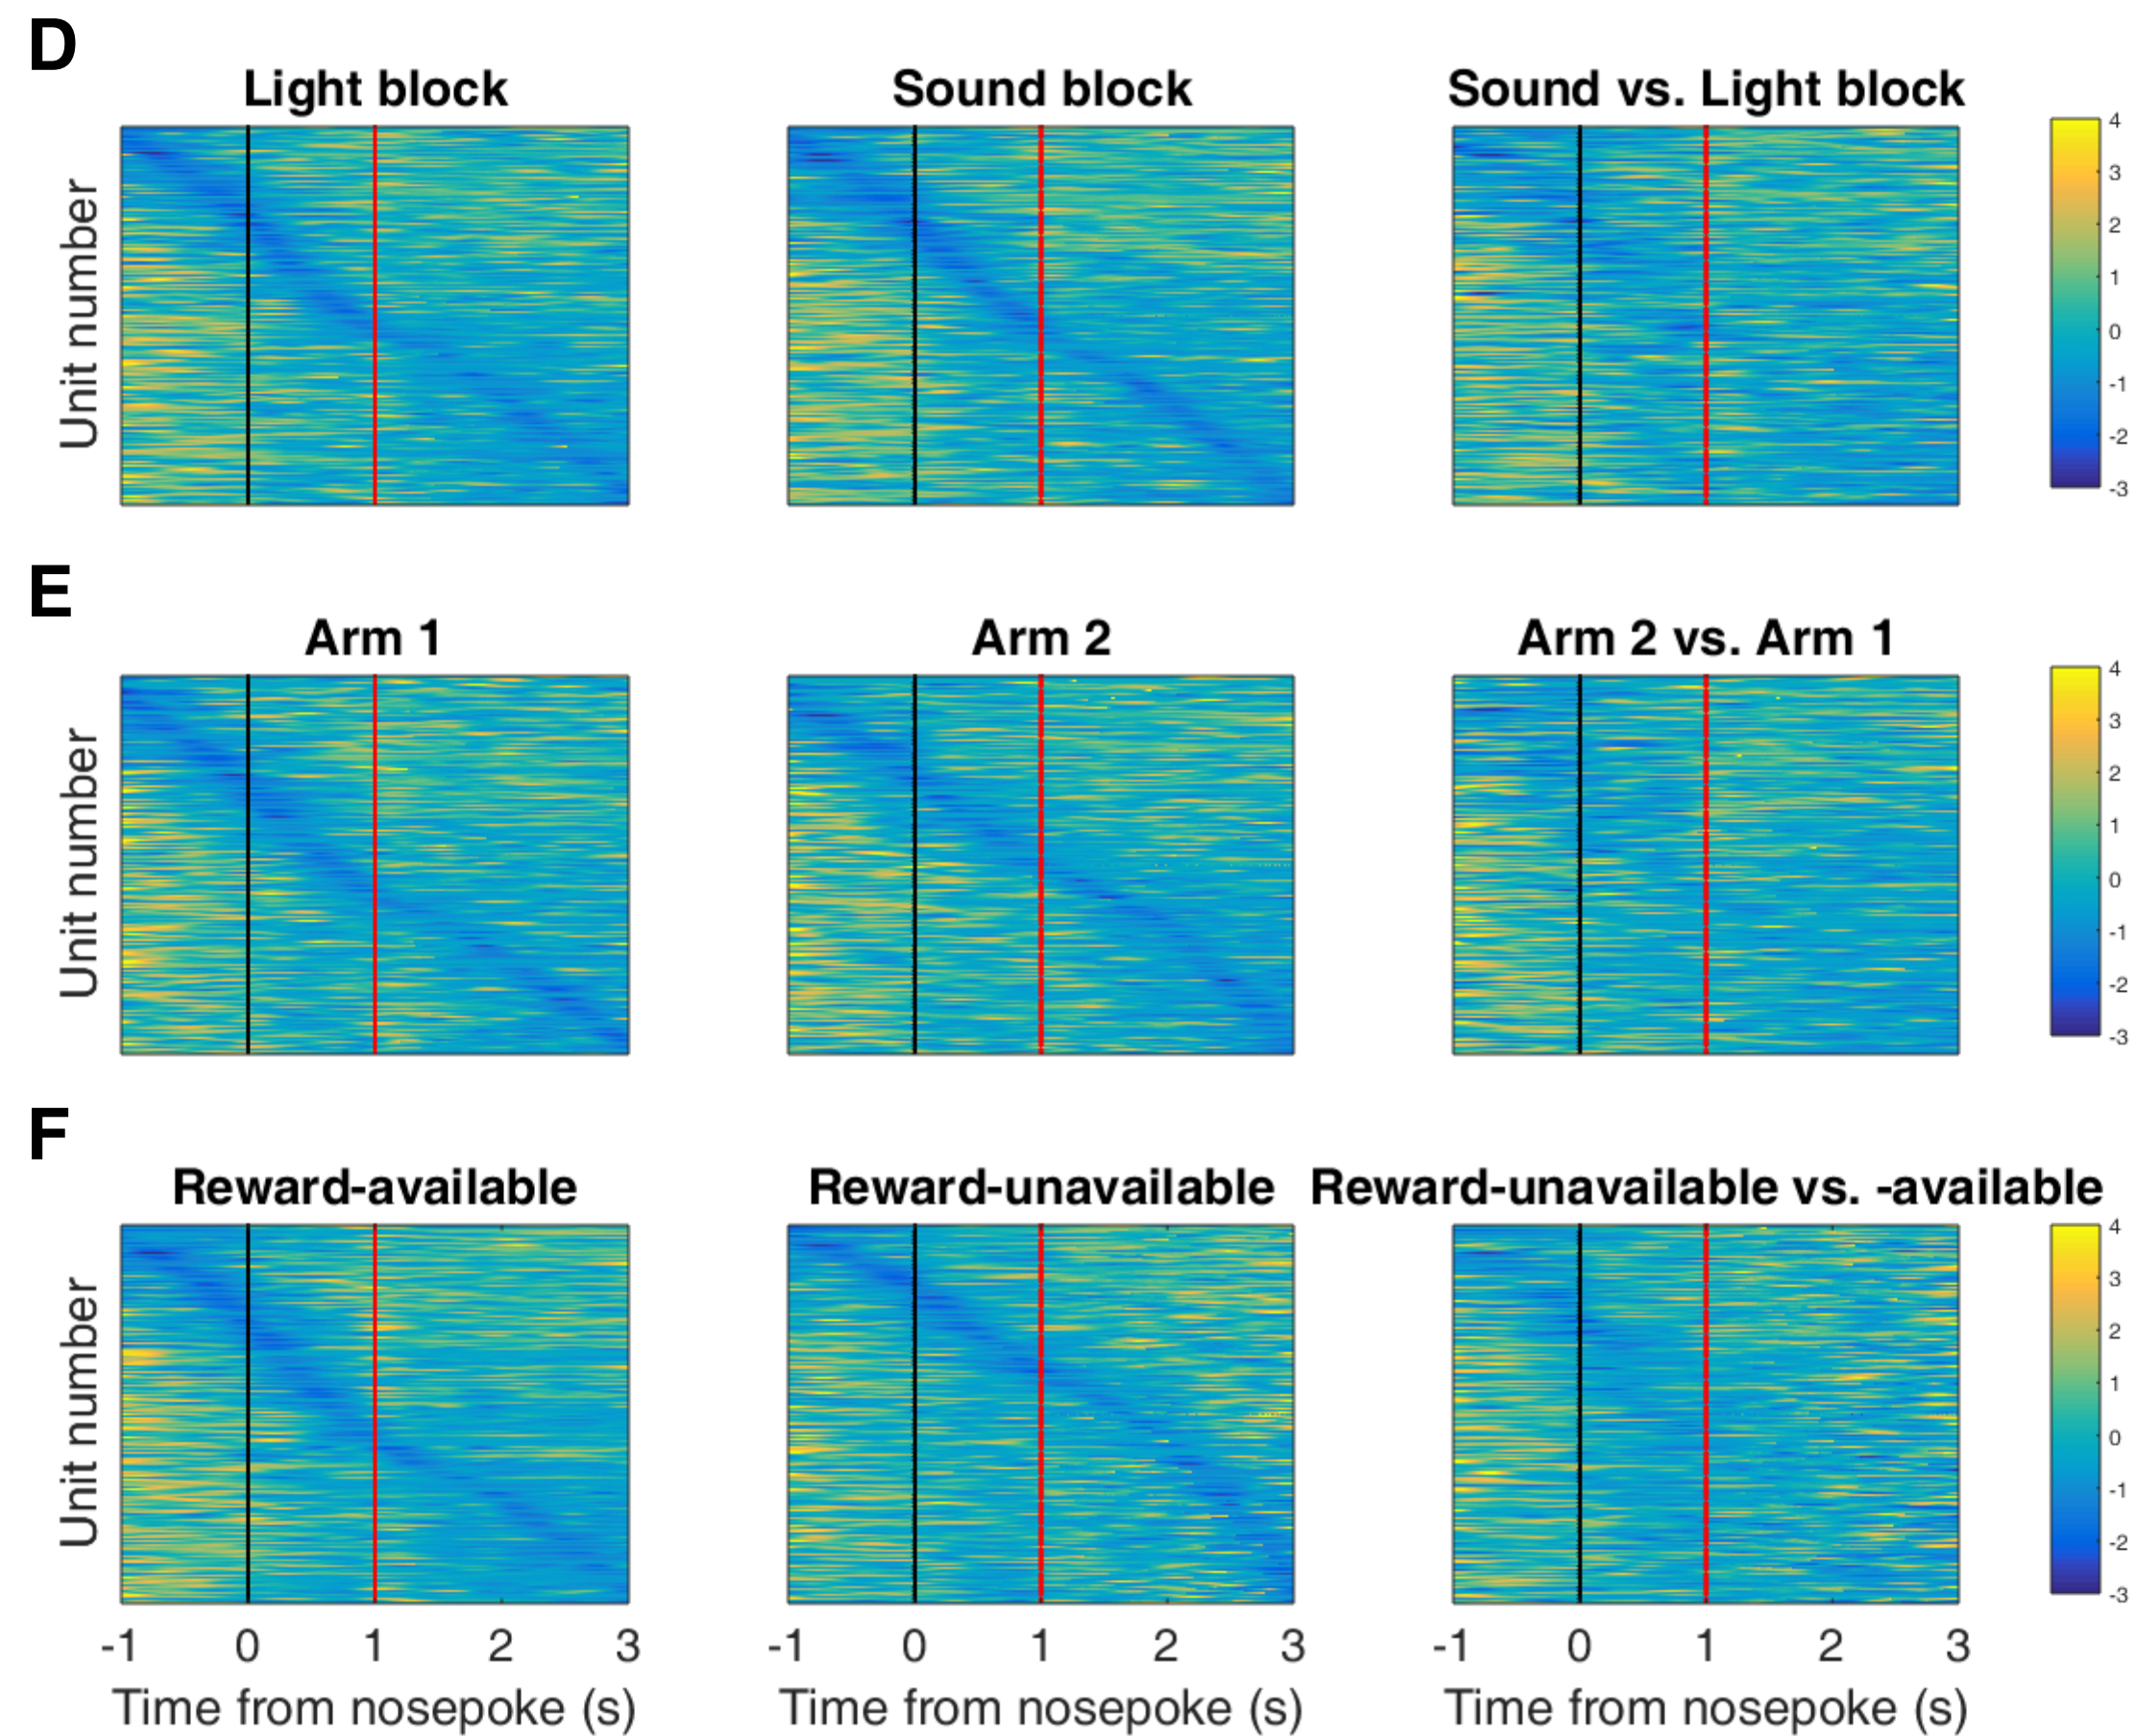

Supplement: supp [file elife_poa_e37275_Figure_7_figure_supplement_2.pdf › elife_poa_e37275_Figure_7_figure_supplement_2.pdf]
